# Supplementary material for: Highly dispersed palladium nanoclusters anchored on nanostructured hafnium(iv) oxide as highly efficient catalysts for the Suzuki–Miyaura coupling reaction
Source: Royal Society of Chemistry journal article supplement (doi:10.1039/d2nj00949h), 2022-01-01

## Electronic Supplementary Information

**Highly dispersed palladium nanoclusters anchored on nanostructured hafnium(IV) oxide as highly efficient catalysts for the Suzuki–Miyaura coupling reaction**

Xiaoxue Wu,<sup>a</sup> Wenting Lin,<sup>a</sup> Li Wang,<sup>a</sup> Nan Li,<sup>a</sup> Gaomei Tu,<sup>a</sup> Yanghe Fu,<sup>a</sup> De-Li Chen,<sup>a</sup>  
Weidong Zhu,<sup>a</sup> Guihua Chen<sup>b</sup> and Fumin Zhang<sup>\*a</sup>

<sup>a</sup>Key Laboratory of the Ministry of Education for Advanced Catalysis Materials, Institute of Physical Chemistry, Zhejiang Normal University, 321004 Jinhua, People's Republic of China

<sup>b</sup>School of Pharmaceutical and Material Engineering, Taizhou University, 318000 Jiaojiang People's Republic of China

[\*] **Corresponding Author:** E-mail: zhangfumin@zjnu.edu.cn

## 1. Experimental

### 1.1. Chemicals

All chemicals are commercially available and used directly without any treatment: hafnium (IV) chloride ( $\text{HfCl}_4$ , Strem, 99.9%), zirconium (IV) tetrachloride ( $\text{ZrCl}_4$ , Strem, 99.9%), 2-aminoterephthalic acid ( $\text{NH}_2\text{-BDC}$ , TCI, >98%), palladium chloride ( $\text{PdCl}_2$ , TCI, 98%), hydrochloric acid ( $\text{HCl}$ , Sinopharm Chemical Reagent Co., Ltd., 37%), N, N-dimethylformamide (DMF, Sinopharm Chemical Reagent Co., Ltd.,  $\geq 99.5\%$ ), methanol (Sinopharm Chemical Reagent Co., Ltd.,  $\geq 99.5\%$ ), ethanol (Sinopharm Chemical Reagent Co., Ltd.,  $\geq 99.5\%$ ), acetic acid (Sinopharm Chemical Reagent Co., Ltd.,  $\geq 99.5\%$ ), acetonitrile (Sinopharm Chemical Reagent Co., Ltd.,  $\geq 99.5\%$ ), acetone (Sinopharm Chemical Reagent Co., Ltd.,  $\geq 99.5\%$ ), ethyl acetate (Sinopharm Chemical Reagent Co., Ltd.,  $\geq 99.5\%$ ), phenylboronic acid ( $\text{C}_6\text{H}_7\text{BO}_2$ , J&K, 99%), bromobenzene ( $\text{C}_6\text{H}_5\text{Br}$ , damas-beta, 98%), iodobenzene ( $\text{C}_6\text{H}_5\text{I}$ , Aldrich, 99%), chlorobenzene ( $\text{C}_6\text{H}_5\text{Cl}$ , Mreda,  $\geq 99\%$ ), 2-bromobenzaldehyde ( $\text{C}_7\text{H}_5\text{BrO}$ , Meryer, 98%), 3-bromobenzaldehyde ( $\text{C}_7\text{H}_5\text{BrO}$ , Aldrich, 97%), 4-bromobenzaldehyde ( $\text{C}_7\text{H}_5\text{BrO}$ , Aldrich, 99%), 4-bromotoluene ( $\text{C}_7\text{H}_7\text{Br}$ , Aldrich, 99%), 2-bromotoluene ( $\text{C}_7\text{H}_7\text{Br}$ , Meryer, 99%), 4-iodotoluene ( $\text{C}_7\text{H}_7\text{I}$ , Aldrich, 99%), 4-bromoanisole ( $\text{C}_7\text{H}_7\text{BrO}$ , Aldrich, 99%), potassium carbonate ( $\text{K}_2\text{CO}_3$ , Aldrich, 99.5%), caesium carbonate ( $\text{Cs}_2\text{CO}_3$ , Meryer, 99.9%), sodium hydroxide ( $\text{NaOH}$ , Kermel, >96%), sodium carbonate ( $\text{Na}_2\text{CO}_3$ , Sinopharm Chemical Reagent Co., Ltd.,  $\geq 99.8\%$ ), sodium bicarbonate ( $\text{NaHCO}_3$ , Sinopharm Chemical Reagent Co., Ltd.,  $\geq 99.8\%$ ), and triethylamine ( $\text{C}_6\text{H}_{15}\text{N}$ , Aldrich,  $\geq 99\%$ ). Deionized water with a resistance >18.2 M $\Omega$  was obtained from a Millipore

Milli-Q ultrapure water purification system. Hydrogen (H<sub>2</sub>, Zhejiang Jinhua Wucheng Datong Gas Co., Ltd, 99.999%). Nitrogen (N<sub>2</sub>, Zhejiang Jinhua Wucheng Datong Gas Co., Ltd, 99.999%).

## 1.2. Characterization

The X-ray powder diffraction (XRD) patterns were obtained on a Philips PW3040/60 diffractometer using Cu K $\alpha$  radiation ( $\lambda=0.1541$  nm, 40 kV, 30 mA).

N<sub>2</sub> adsorption isotherms were measured at -196 °C on a Micromeritics ASAP 2020 instrument. The samples were outgassed under vacuum at 200 °C for 12 h before adsorption measurement. The surface area was determined using the Brunauer-Emmett-Teller (BET) method.

The morphology of the samples were obtained by field emission SEM on a scanning electron microscope (a Hitachi S-4800 microscope) and TEM on a transmission electron microscope (JEM2100F, JEOL, Japan) working at 200 kV.

X-ray photoelectron spectroscopy (XPS) data were collected on an ESCALAB250 electron spectrometer from VG Scientific using 300 W Al-K $\alpha$  radiation. The XPS data were internally calibrated, fixing the binding energy of C 1s at 284.8 eV.

The surface properties of the catalysts were measured by temperature-programmed desorption of ammonia (NH<sub>3</sub>-TPD, a Micro-meristics AutoChem II 2920 instrument). The sample (150 mg) was purged under a flow of He of 30 mL/min at 350 °C for 2 h. After purging, the sample was cooled to 110 °C, and the feed composition was switched to a mixture containing 20% NH<sub>3</sub> in He (30 mL/min) for 30 min. The physisorbed ammonia was flushed out with He flow for 1 h. Afterward, the sample cell was heated at

10 °C/min under He to 900 °C. The concentration of the desorbed ammonia was monitored continuously with a TCD detector.

The amounts of the metal Pd species in the different samples were determined by an IRIS Intrepid II XSP inductively coupled plasma-atomic emission spectrometer (ICP-AES).

Electron Paramagnetic Resonance (EPR) measurement was obtained on the Bruker EPR EMXplus-9.5/12 at room temperature. The frequency and power of the microwave were set to 9.847226 GHz and 2.0000 mW, respectively. Gauss field modulation at 100 kHz and a time constant of 20 ms was used for detection.

The nuclear magnetic resonance (NMR) spectra of the products were recorded on a Bruker Avance 600 MHz spectrometer at 297 K using CDCl<sub>3</sub> ( $\delta$  H=7.26,  $\delta$  C=77.0) as an internal standard for <sup>1</sup>H NMR and 125 MHz for <sup>13</sup>C NMR.

### **1.3. Catalyst preparation**

#### **Synthesis of Pd@NH<sub>2</sub>-UiO-66(Hf)**

Pd@NH<sub>2</sub>-UiO-66(Hf) was synthesized by a one-pot strategy according to the procedure reported in the previous papers with some slight modification.<sup>1</sup> Briefly, HfCl<sub>4</sub> (4.7 mmol) and NH<sub>2</sub>-BDC (4.7 mmol) were dissolved in DMF (200 mL) in a round-bottom flask (500 mL in capacity) and then added acetic acid (36 mL), deionized water (5.0 mL), and PdCl<sub>2</sub> precursor (0.5 mL, 10 mg/mL) to the solution. The mixture was treated under ultrasound for 10 min to form a homogeneous solution. Afterward, the mixture was heated at 75 °C for 20 h. Subsequently, the temperature was raised to 130 °C, and the mixture was allowed to stir for another 4 h, and then cooled to room

temperature. The product was centrifugated at 9000 rpm for 4 min, washed with DMF and methanol three times, respectively, and finally dried under vacuum at 120 °C for 12 h. Other control samples, including Pd@NH<sub>2</sub>-UiO-66(Zr), NH<sub>2</sub>-UiO-66(Zr), and NH<sub>2</sub>-UiO-66(Hf), were also synthesized by a similar method.

### **Synthesis of Pd/HfO<sub>2</sub>@CN**

The Pd/HfO<sub>2</sub>@CN powders were fabricated directly via one-step pyrolysis strategy. Typically, the Pd@NH<sub>2</sub>-UiO-66(Hf) precursor (0.1 g) was transferred into a tube furnace. The furnace was heated at 600 °C at a rate of 3 °C/min with nitrogen gas flow (flow rate: 100 ml/min). The furnace was held at this temperature for 3 h and then allowed to cool to room temperature. Before use, the obtained powder was further reduced in a stream of hydrogen (H<sub>2</sub>)/N<sub>2</sub> (10:40 mL/min) at 250 °C for 4 h. Pd/ZrO<sub>2</sub>@CN was prepared following the same procedure.

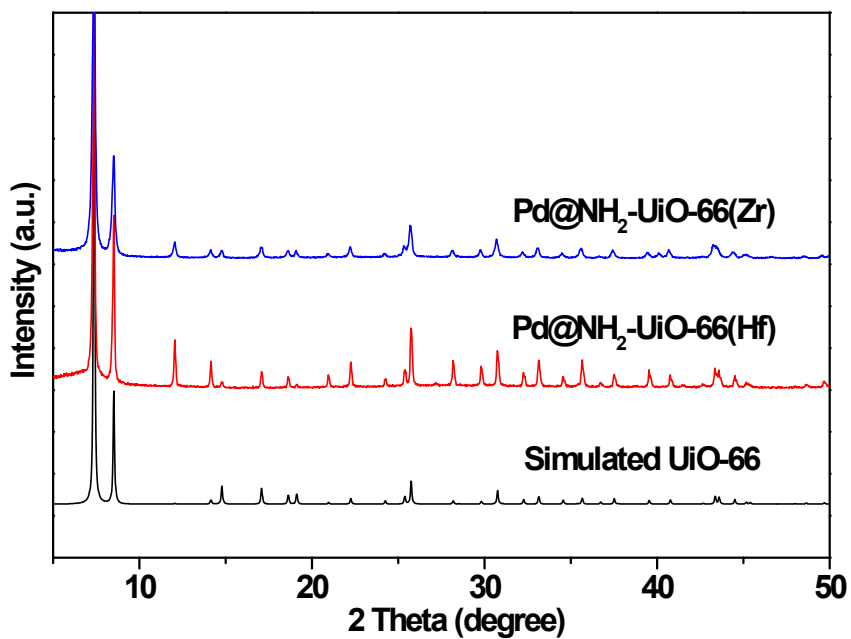

**Fig. S1** XRD patterns of simulated UiO-66, the synthesized Pd@NH<sub>2</sub>-UiO-66(Hf) and Pd@NH<sub>2</sub>-UiO-66(Zr).

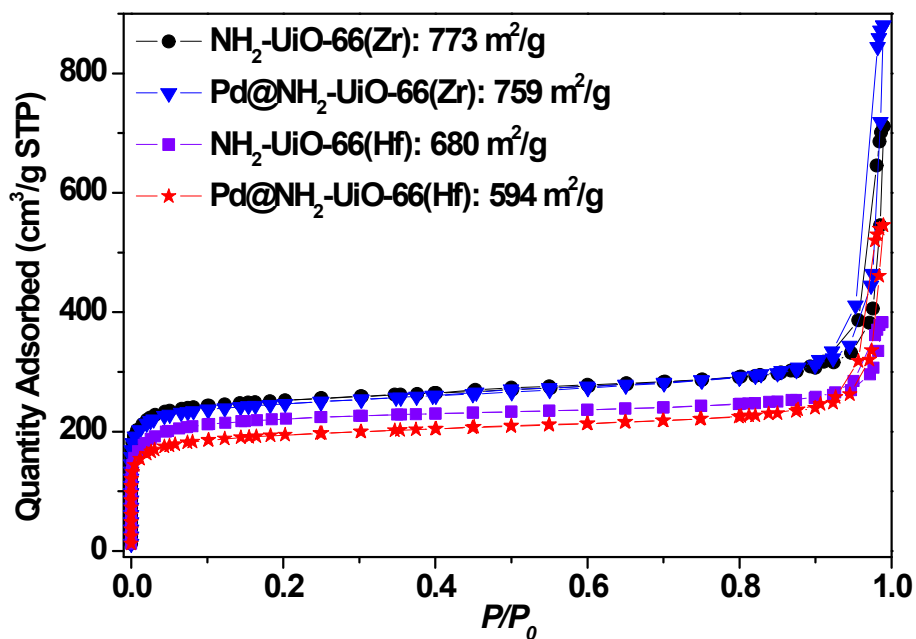

**Fig. S2** N<sub>2</sub> adsorption–desorption isotherms of NH<sub>2</sub>-UiO-66(Zr), Pd@NH<sub>2</sub>-UiO-66(Zr), NH<sub>2</sub>-UiO-66(Hf), and Pd@NH<sub>2</sub>-UiO-66(Hf).

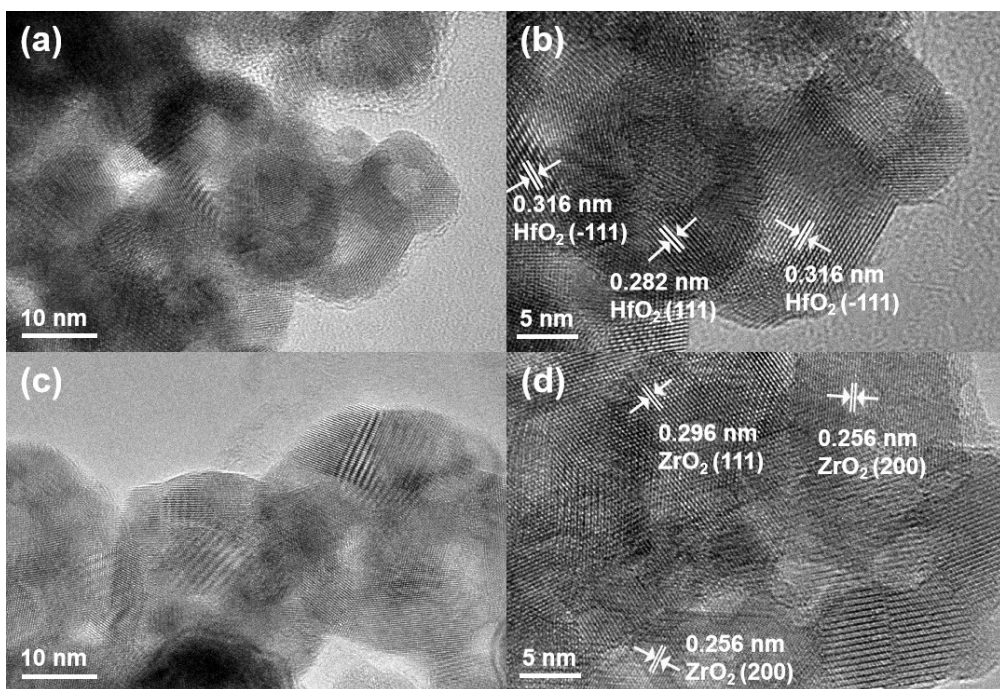

Fig. S3 TEM images of Pd@HfO<sub>2</sub> (a and b) and Pd@ZrO<sub>2</sub> (c and d).

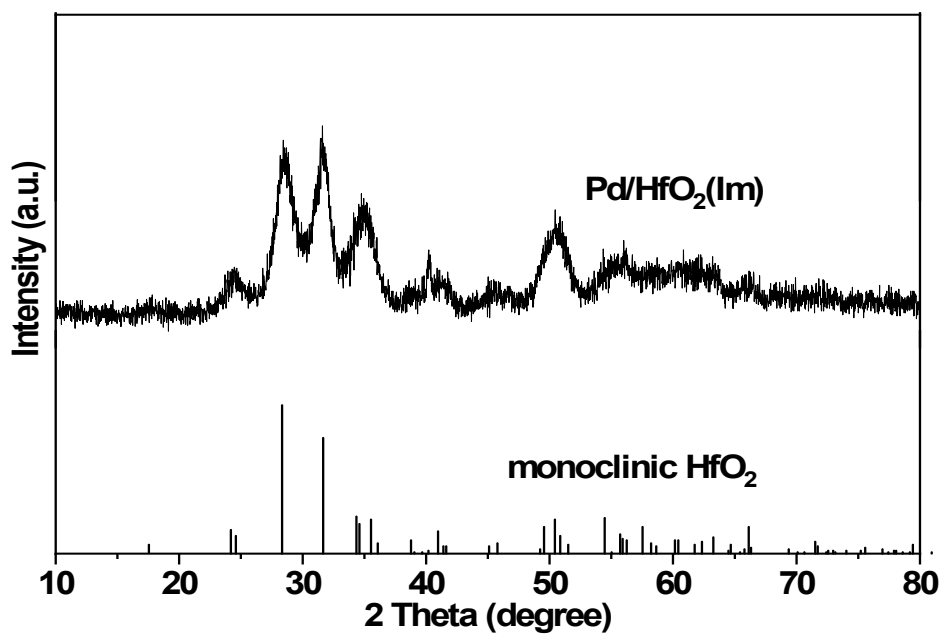

Fig. S4 XRD pattern of Pd/HfO<sub>2</sub>(Im).

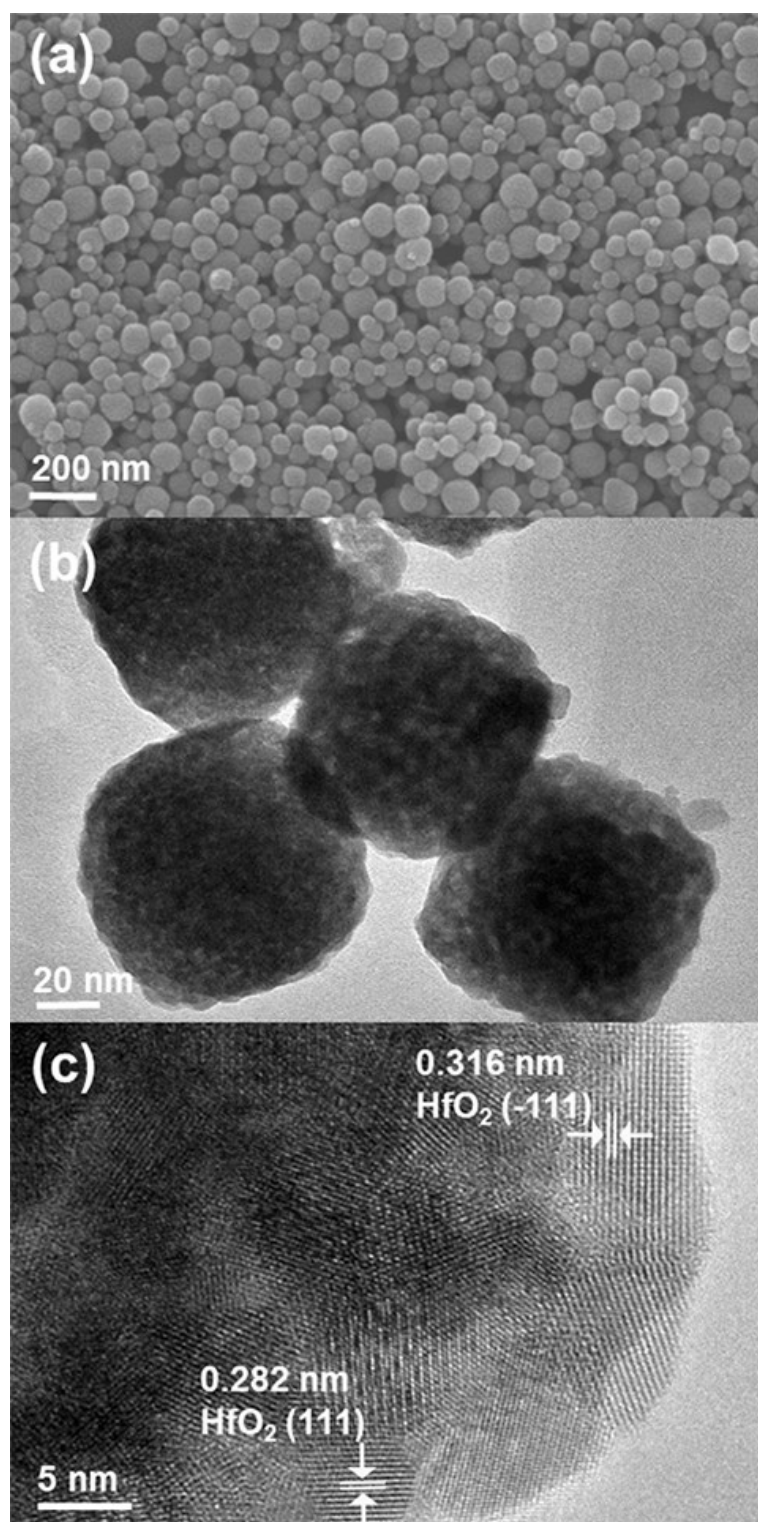

**Fig. S5** SEM (a), TEM (b), and HRTEM (c) images of Pd/HfO<sub>2</sub>(Im).



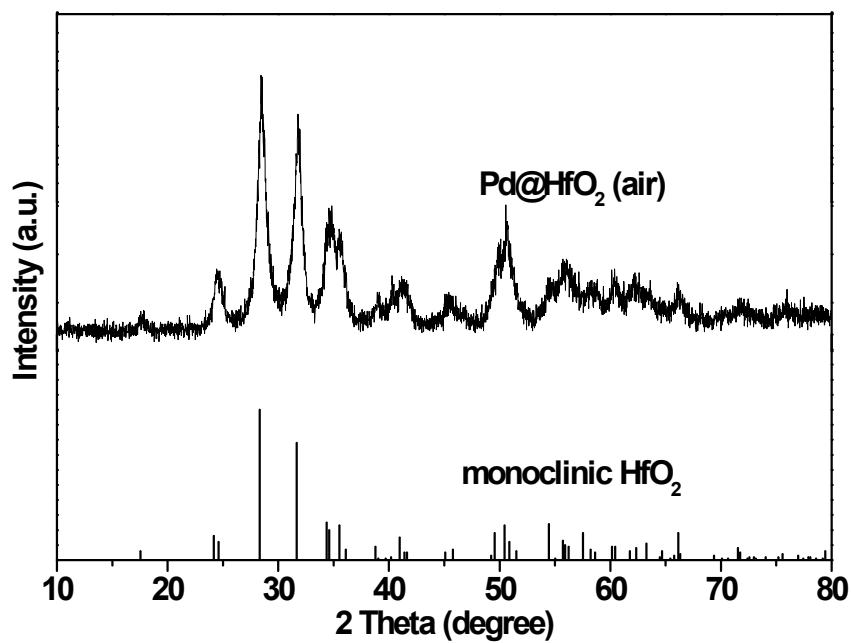

Fig. S6 XRD pattern of Pd@HfO<sub>2</sub>(air).

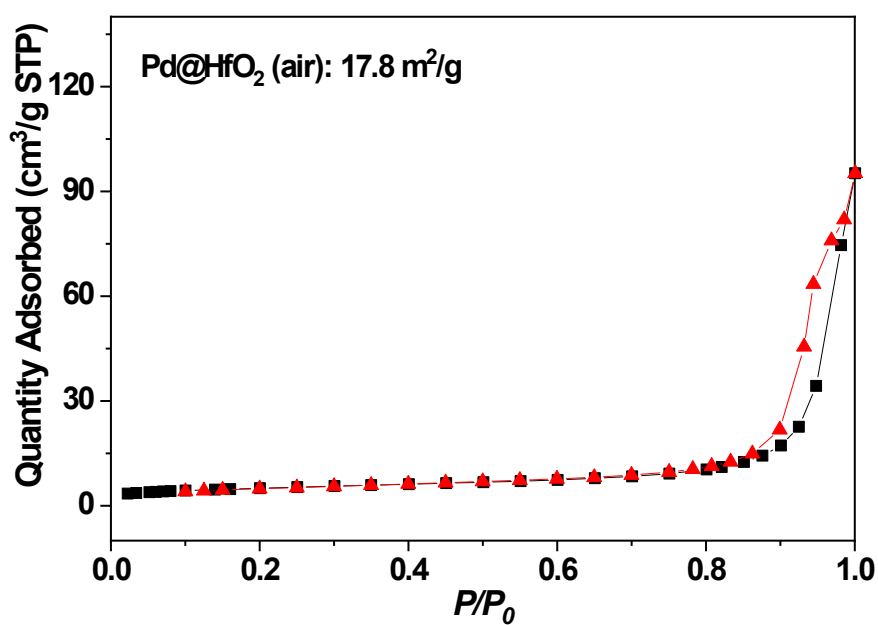

Fig. S7 N<sub>2</sub> adsorption-desorption isotherms of Pd@HfO<sub>2</sub>(air).

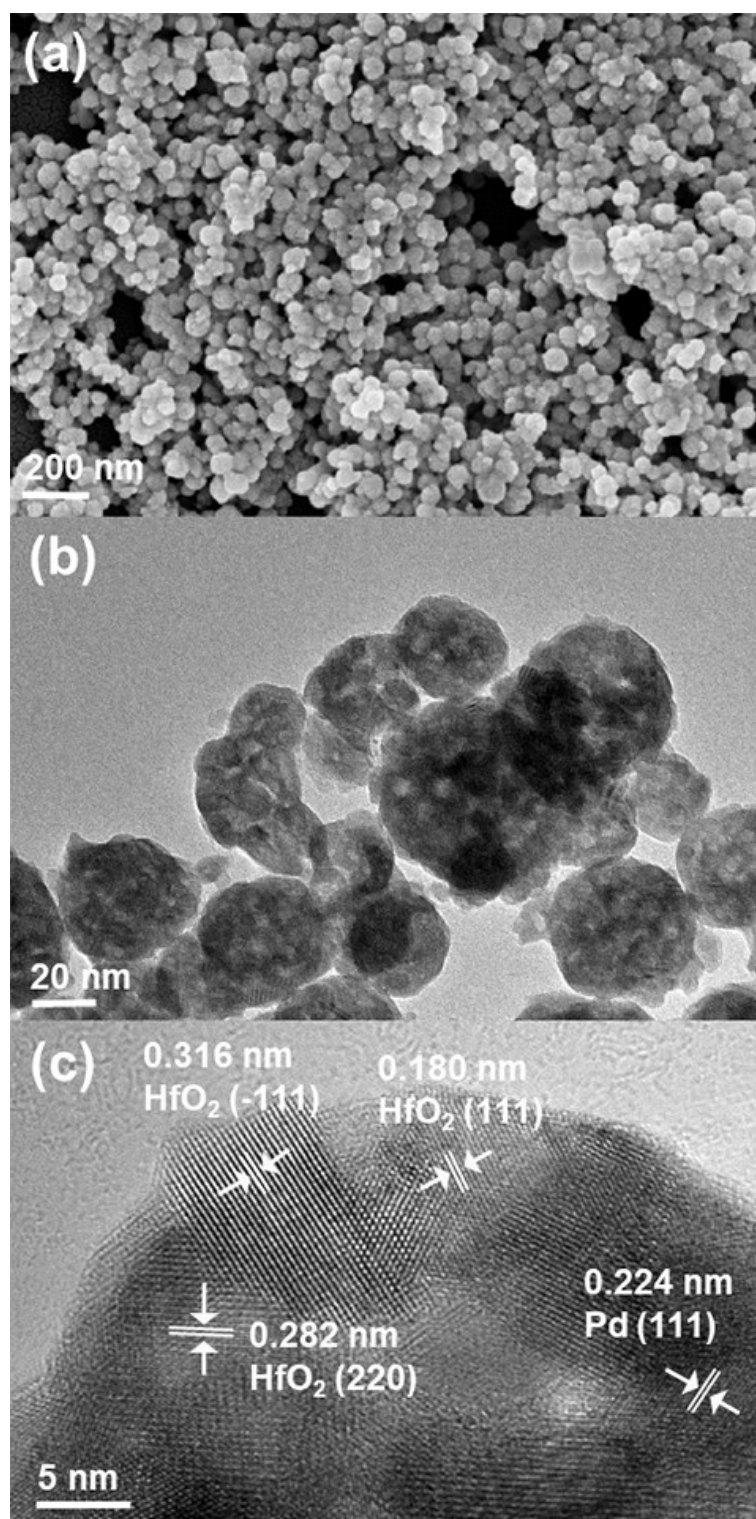

**Fig. S8** SEM (a), TEM (b), and HRTEM (c) images of Pd@HfO<sub>2</sub>(air).

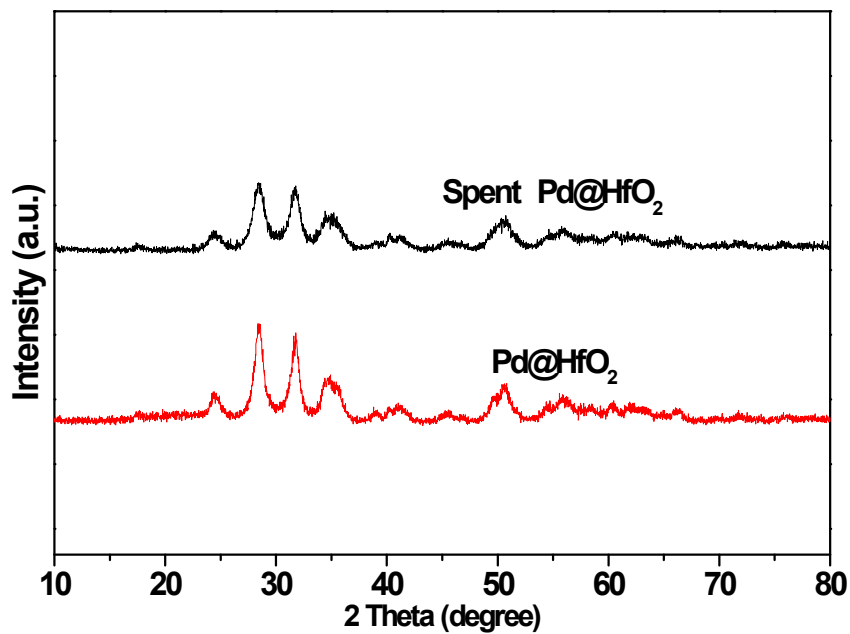

Fig. S9 XRD patterns of the fresh and used Pd@HfO<sub>2</sub> catalyst.

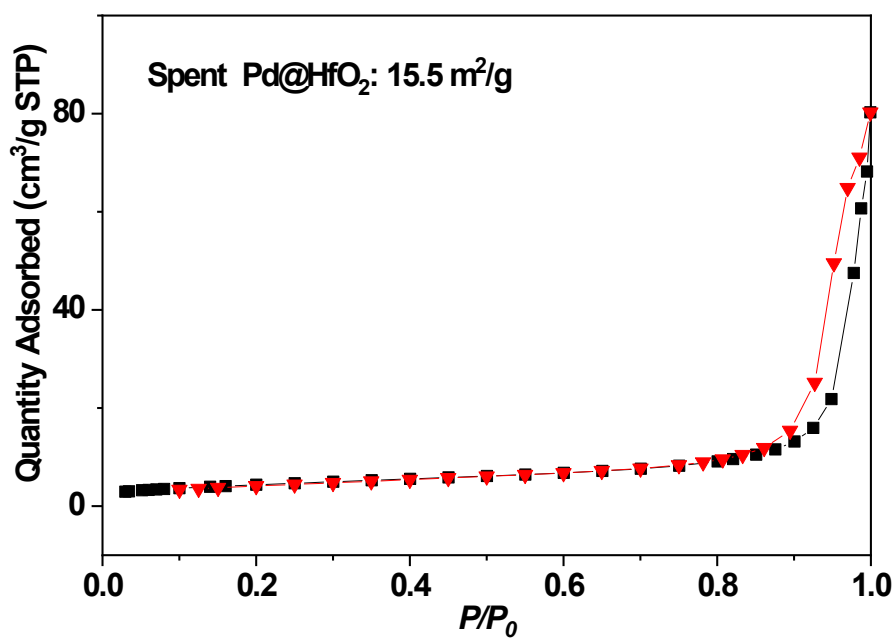

Fig. S10 N<sub>2</sub> adsorption isotherms of the spent Pd@HfO<sub>2</sub> catalyst.

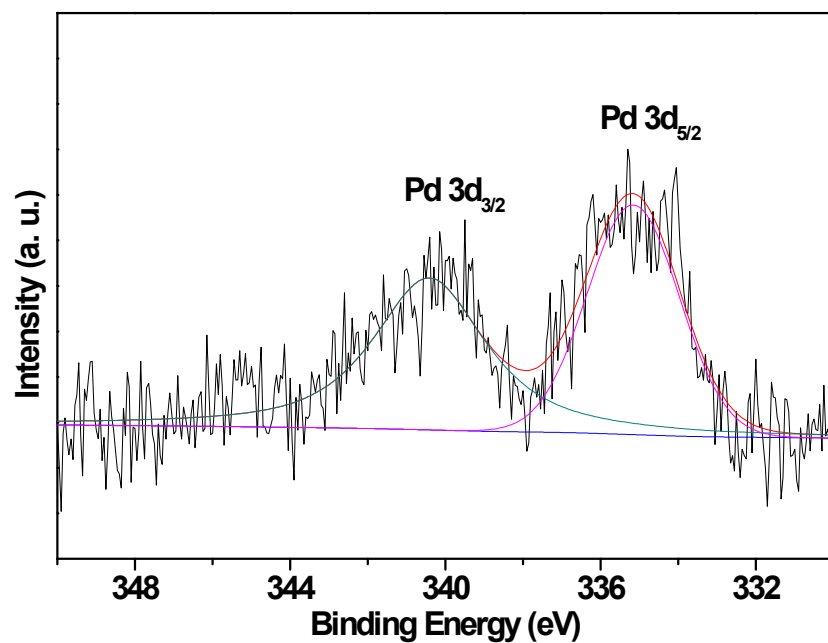

**Fig. S11** High resolution XPS spectrum of Pd 3d for the spent Pd@HfO<sub>2</sub> catalyst.

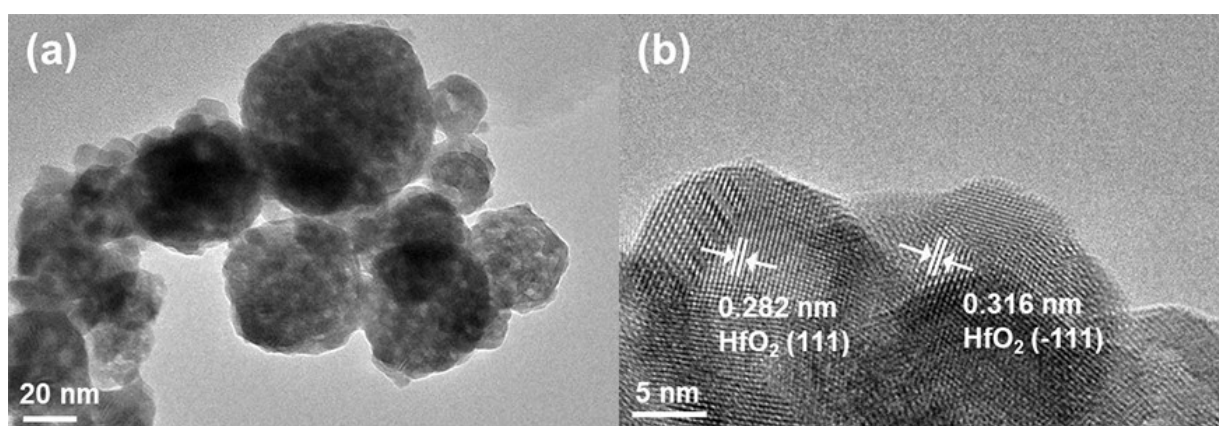

**Fig. S12** TEM (a) and HRTEM (b) images of the spent Pd@HfO<sub>2</sub> catalyst.

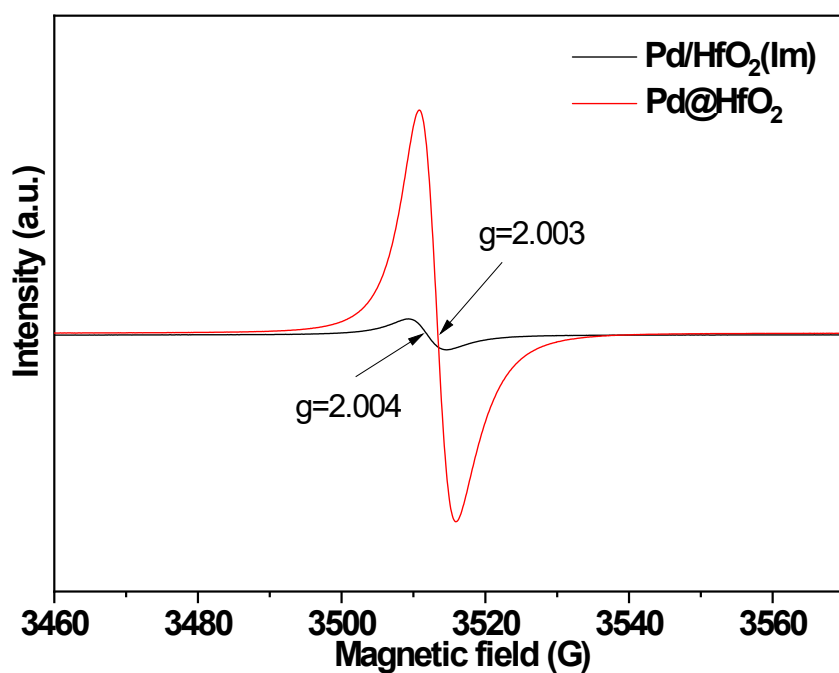

**Fig. S13** EPR spectra of Pd@HfO<sub>2</sub> and Pd/HfO<sub>2</sub>(Im).

The Pd@HfO<sub>2</sub> has more oxygen vacancies in comparison with that of Pd/HfO<sub>2</sub>(Im), likely owing to the strong interaction between HfO<sub>2</sub> and Pd formed during the two-step thermal treatment, which is beneficial for forming a highly stable catalyst.

**Table S1** Suzuki-Miyaura cross-coupling reaction of bromobenzene and arylboronic acids using palladium catalysts

| Entry | Catalyst                       | R                  | Products | T<br>(°C) | Yield<br>(%) |
|-------|--------------------------------|--------------------|----------|-----------|--------------|
| 1     | Pd@HfO <sub>2</sub>            | H                  |          | 50        | >99          |
| 2     | Pd@NH <sub>2</sub> -UiO-66(Hf) | H                  |          | 50        | 50           |
| 3     | Pd@NH <sub>2</sub> -UiO-66(Zr) | H                  |          | 50        | 41           |
| 4     | Pd/HfO <sub>2</sub> @CN        | H                  |          | 50        | 85           |
| 5     | Pd/ZrO <sub>2</sub> @CN        | H                  |          | 50        | 80           |
| 6     | Pd@HfO <sub>2</sub>            | 4-CH <sub>3</sub>  |          | 80        | 75           |
| 7     | Pd@HfO <sub>2</sub>            | 4-OCH <sub>3</sub> |          | 80        | 72           |
| 8     | Pd@HfO <sub>2</sub>            | 2-CH <sub>3</sub>  |          | 80        | 70           |

Reaction conditions: bromobenzene (0.32 mmol), arylboronic acid (0.38 mmol), K<sub>2</sub>CO<sub>3</sub> (0.38 mmol), Ethanol/H<sub>2</sub>O = 1:1 (4.0 mL), catalyst (0.1 mol%), 2 h.

**Table S2** Comparison of catalytic activity for the Suzuki-Miyaura coupling reaction over different catalysts.

| Entry | Catalyst                                         | Reaction conditions                                                                                        | Yield | Ref.      |
|-------|--------------------------------------------------|------------------------------------------------------------------------------------------------------------|-------|-----------|
|       |                                                  | Catalyst/solvent/base/temperature/time                                                                     | (%)   |           |
| 1     | Pd@HfO <sub>2</sub>                              | 0.1 mol% catalyst/EtOH: H <sub>2</sub> O<br>(1:1)/K <sub>2</sub> CO <sub>3</sub> (1.2 equiv)/50 °C/2 h     | >99   | This work |
| 2     | Pd-Pt<br>Nanodendrites                           | 4 mg catalyst/EtOH: H <sub>2</sub> O (1:1)/Cs <sub>2</sub> CO <sub>3</sub><br>(1.2 equiv)/80 °C/2 h        | 98    | 2         |
| 3     | Pd@porous<br>SiO <sub>2</sub>                    | 0.003 mol% catalyst/DMF: H <sub>2</sub> O<br>(21:1)/Cs <sub>2</sub> CO <sub>3</sub> (2.0 equiv)/200 °C/1 h | 100   | 3         |
| 4     | Pd/Porous-<br>nanorods-CeO <sub>2</sub> -<br>160 | 0.3 mol% catalystDMF: H <sub>2</sub> O<br>(1:1)/K <sub>2</sub> CO <sub>3</sub> (3.0 equiv)/90 °C/1 h       | 72.3  | 4         |
| 5     | Pd@Mesopor<br>ous Carbon                         | 2 mol% catalyst/EtOH: H <sub>2</sub> O<br>(1:1)/Na <sub>2</sub> CO <sub>3</sub> (2.0 equiv)/80 °C/1 h      | 98    | 5         |
| 6     | Pd@Fluorescent<br>Material                       | 0.05 mol% catalyst/H <sub>2</sub> O/K <sub>2</sub> CO <sub>3</sub> (2.0<br>equiv)/80 °C/10 h               | 91    | 6         |
| 7     | Pd-TiO <sub>2</sub> /Carbon<br>Nanofibers        | 10 mg catalyst/H <sub>2</sub> O/K <sub>2</sub> CO <sub>3</sub> (2.0<br>equiv)/50 °C/5 h                    | 5     | 7         |
| 8     | SiO <sub>2</sub> /(Tetraethyl<br>ene glycol)/Pd  | 0.75 mol% catalyst/Toluene/K <sub>3</sub> PO <sub>4</sub> (2.0<br>equiv)/110 °C/12 h                       | 86    | 8         |
| 9     | Pd/SBA-15                                        | 0.2 mol% catalyst/EtOH: H <sub>2</sub> O                                                                   | 88    | 9         |

|    |                                       |                                                                                                        |    |    |
|----|---------------------------------------|--------------------------------------------------------------------------------------------------------|----|----|
|    |                                       | (1:3)/K <sub>2</sub> CO <sub>3</sub> (3.0 equiv)/85°C/10 h                                             |    |    |
| 10 | Pd/Pr                                 | 0.4 mol% catalyst/DMF: H <sub>2</sub> O                                                                | 86 | 10 |
|    | Coordination                          | (1:1)/K <sub>2</sub> CO <sub>3</sub> (2.0 equiv)/70 °C/3 h                                             |    |    |
|    | Polymers                              |                                                                                                        |    |    |
| 11 | Pd@gel-Fe <sub>3</sub> O <sub>4</sub> | 1 mol% catalyst/MeOH/Na <sub>2</sub> CO <sub>3</sub> (3.0 equiv)/60 °C/5 h                             | 89 | 11 |
| 12 | Pd/TiO <sub>2</sub>                   | 0.7 mol% catalyst/NMP: H <sub>2</sub> O (2.5:1)/Na <sub>2</sub> CO <sub>3</sub> (1.5 equiv)/120 °C/4 h | 91 | 12 |
| 13 | Pd/Fe <sub>3</sub> O <sub>4</sub> NPs | 0.2 mol% catalyst/MeOH/K <sub>2</sub> PO <sub>3</sub> (3.0 equiv)/60 °C/18 h                           | 91 | 13 |

---



## Reference

- 1 S. Zheng, P. Y. Yang, F. M. Zhang, D. L. Chen and W. D. Zhu, *Chem. Eng. J.*, 2017, **328**, 977–987.
- 2 Z. J. Wang, J. J. Lv, J. J. Feng, N. B. Li, X. H. Xu, A. J. Wang and R. H. Qiu, *RSC Adv.*, 2015, **5**, 28467–28473.
- 3 J. C. Park, E. Heo, A. Kim, M. Kim, K. H. Park and H. Song, *J. Phys. Chem. C*, 2011, **115**, 15772–15777.
- 4 S. Zhang, J. Li, W. Gao and Y. Q. Qu, *Nanoscale*, 2015, **7**, 3016–3021.
- 5 L. Zhong, A. Chokkalingam, W. S. Cha, K. S. Lakhi, X. Y. Su, G. Lawrence and A. Vinu, *Catal. Today*, 2015, **243**, 195–198.
- 6 Q. Cai, G. S. Liang, Y. F. Xu, X. H. Qian and W. P. Zhu, *RSC Adv.*, 2016, **6**, 60996–61000.
- 7 J. Wang, J. Bai, H. Liang and C. Li, *Colloids Surf. A*, 2019, **572**, 283–289.
- 8 N. Kim, M. S. Kwon, C. M. Park and J. Park, *Tetrahedron Lett.*, 2004, **45**, 7057–7059.
- 9 P. Han, X.M. Wang, X.P. Qiu, X.L. Ji and L.X. Gao, *J. Mol. Catal. A-Chem.* 2007, **272**, 136–141.
- 10 L. X. You, W. H. Zong, G. Xiong, F. Ding, S. J. Wang, B. Y. Ren, I. Dragutan, V. Dragutan and Y. G. Sun, *Appl. Catal. A-Gen.*, 2016, **511**, 1–10.
- 11 Y. T. Liao, L. S. He, J. Huang, J. Y. Zhang, L. Zhuang, H. Shen and C. Y. Su, *ACS Appl. Mater. Interfaces*, 2010, **2**, 2333–2338.
- 12 M. Nasrollahzadeh and S. M. Sajadi, *J. Colloid. Interf. Sci.*, 2016, **465**, 121–127.
- 13 M. Nasrollahzadeh, S. M. Sajadi, A. Rostami-Vartooni and M. Khalaj, *J. Mol. Catal. A-Chem.*, 2015, **396**, 31–39.

## Analytical data of the products

biphenyl

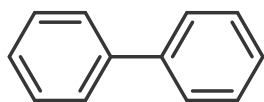

$^1\text{H}$  NMR (600 MHz,  $\text{CDCl}_3$ )  $\delta$ =7.89–7.73 (m, 1H), 7.71–7.58 (m, 1H), 7.61–7.40 (m, 1H).  
 $^{13}\text{C}$  NMR (151 MHz,  $\text{CDCl}_3$ )  $\delta$ =141.41 (s), 128.96 (s), 128.78 (s), 127.40 (d,  $J$ =14.0).

2-biphenylcarboxaldehyde

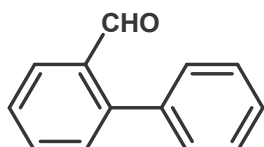

$^1\text{H}$  NMR (600 MHz,  $\text{CDCl}_3$ )  $\delta$ =10.02 (s, 1H), 8.07 (dd,  $J$ =7.8, 1.1, 1H), 7.66 (td,  $J$ =7.5, 1.3, 1H), 7.58–7.44 (m, 5H), 7.44–7.37 (m, 2H).  $^{13}\text{C}$  NMR (151 MHz,  $\text{CDCl}_3$ )  $\delta$  192.44, 145.99, 137.77, 133.74, 133.60, 130.82, 130.14, 128.47, 128.16, 127.81, 127.59.

4-biphenylcarboxaldehyde

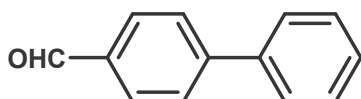

$^1\text{H}$  NMR (600 MHz,  $\text{CDCl}_3$ )  $\delta$ =10.05 (s, 1H), 7.95 (d,  $J$ =8.0, 2H), 7.74 (d,  $J$ =8.0, 2H), 7.64 (d,  $J$ =7.5, 2H), 7.47 (dt,  $J$ =33.0, 7.3, 3H).  $^{13}\text{C}$  NMR (151 MHz,  $\text{CDCl}_3$ )  $\delta$ =191.98 (s), 147.11 (s), 139.66 (s), 135.70 (s), 135.23 (s), 132.75 (s), 130.32 (s), 129.10 (s), 128.57 (s), 128.00 (d,  $J$ =18.7), 127.67 (s), 127.40 (s), 127.18 (s).

4-methoxybiphenyl

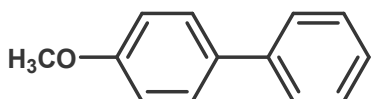

$^1\text{H}$  NMR (600 MHz,  $\text{CDCl}_3$ )  $\delta$ =7.67–7.59 (m, 1H), 7.50 (s, 1H), 7.39 (t,  $J$ =7.4, 1H), 7.06 (d,  $J$ =8.7, 1H), 3.91 (s, 1H).  $^{13}\text{C}$  NMR (151 MHz,  $\text{CDCl}_3$ )  $\delta$ =159.22 (s), 140.89 (s), 133.83 (s), 128.81 (s), 128.23 (s), 126.78 (d,  $J$ =9.9), 114.28 (s), 55.39 (s).

2-phenyltoluene

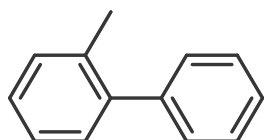

$^1\text{H}$  NMR (600 MHz,  $\text{CDCl}_3$ )  $\delta$ =7.77–7.35 (m, 1H), 2.67–2.48 (m, 1H).  $^{13}\text{C}$  NMR (151 MHz,  $\text{CDCl}_3$ )  $\delta$  = 142.21 (t,  $J$ =5.7), 135.53 (d,  $J$ =2.7), 130.55 (d,  $J$ =4.6), 130.05 (d,  $J$ =4.6), 129.43 (d,  $J$ =4.4), 128.98 (s), 128.31 (d,  $J$ =4.6), 127.50 (d,  $J$ =4.7), 127.00 (d,  $J$ =4.3), 126.03 (d,  $J$ =5.0), 20.73 (s).

4-phenyltoluene

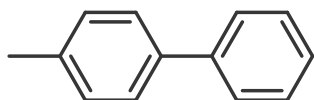

<sup>1</sup>H NMR (600 MHz, CDCl<sub>3</sub>) δ=7.74 (dd, *J*=8.3, 1.2, 1H), 7.66 (d, *J*=8.1, 1H), 7.58 (t, *J*=7.8, 1H), 7.48 (s, 1H), 7.40 (d, *J*=7.9, 1H), 2.55 (s, 2H). <sup>13</sup>C NMR (151 MHz, CDCl<sub>3</sub>) δ=141.32 (s), 138.51 (s), 137.13 (s), 129.64 (s), 128.87 (s), 128.69 (s), 127.34–127.06 (m), 126.96 (s), 21.24 (s).

4-nitrobiphenyl

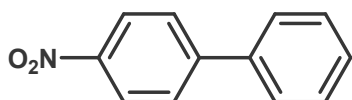

<sup>1</sup>H NMR (600 MHz, CDCl<sub>3</sub>) δ 8.35–8.30 (m, 1H), 7.78–7.74 (m, 1H), 7.67–7.64 (m, 1H), 7.55–7.45 (m, 2H), 7.28 (s, 1H). <sup>13</sup>C NMR (151 MHz, CDCl<sub>3</sub>) δ 147.66 (s), 138.79 (s), 129.17 (s), 128.93 (s), 127.82 (s), 127.40 (s), 124.13 (s).

**Figs. S14-S19**  $^1\text{H}$  and  $^{13}\text{C}$  NMR spectra of coupling products.

**Fig. S14**  $^1\text{H}$  and  $^{13}\text{C}$  NMR spectra for biphenyl.

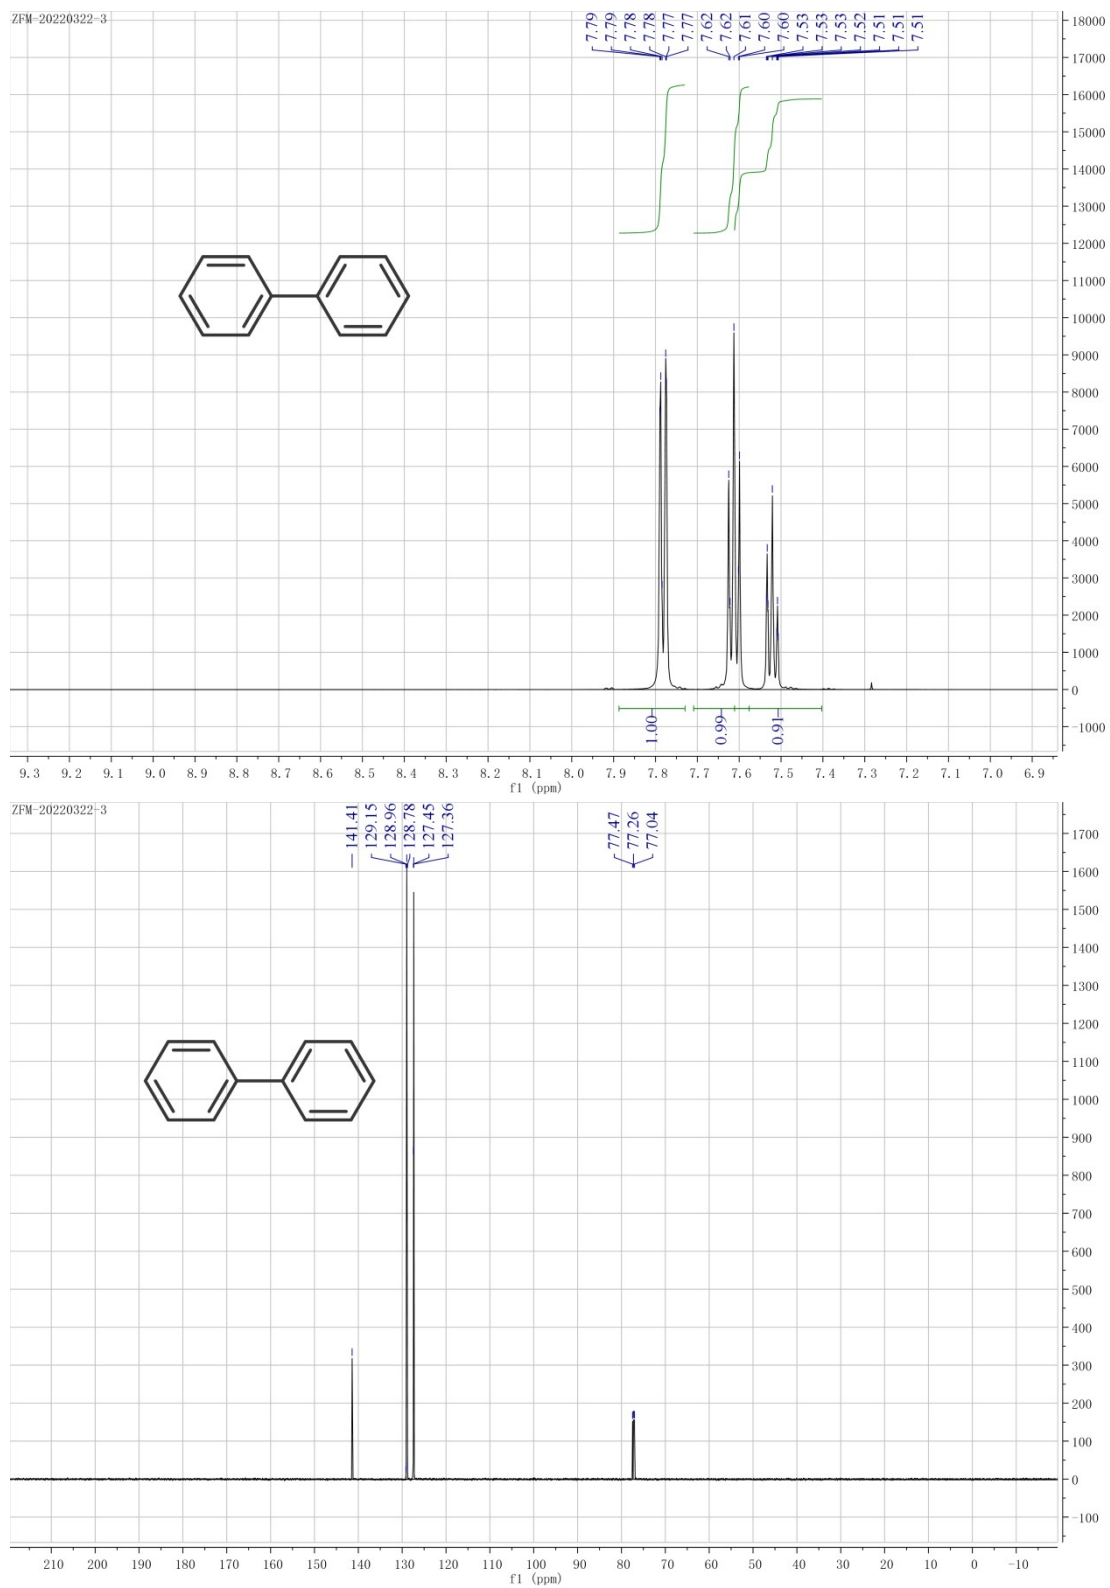

Fig. S15  $^1\text{H}$  and  $^{13}\text{C}$  NMR spectra for 2-biphenylcarboxaldehyde.

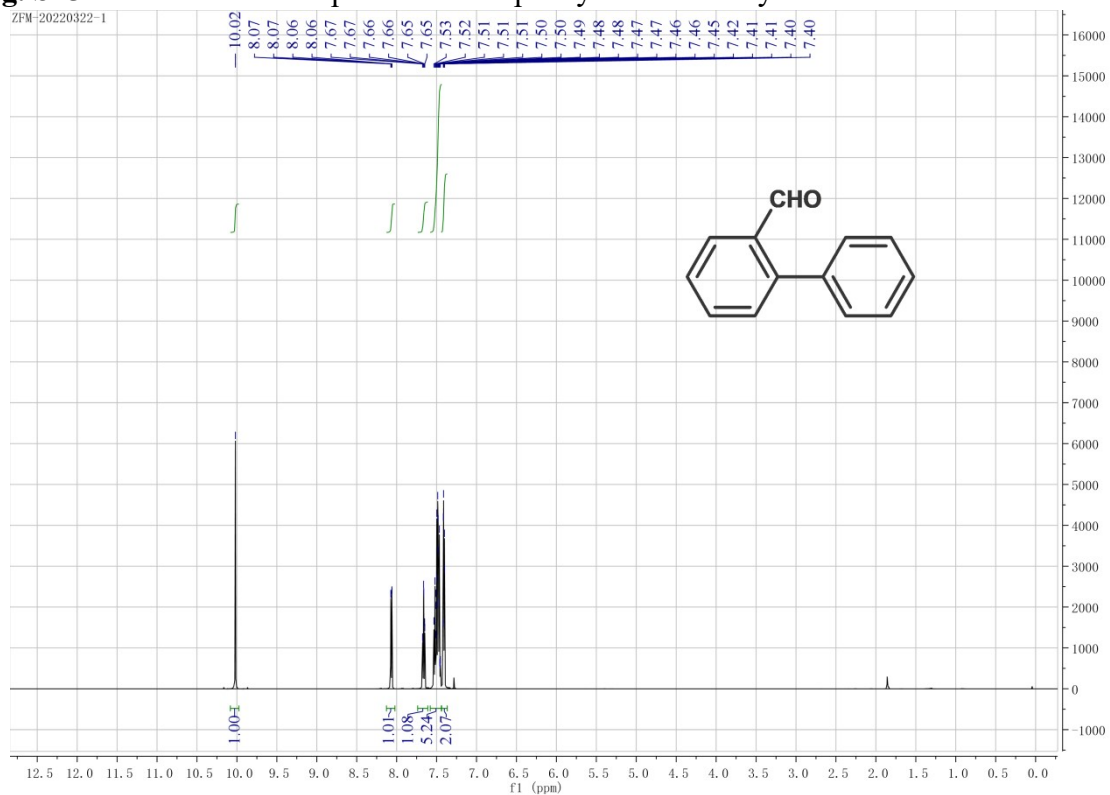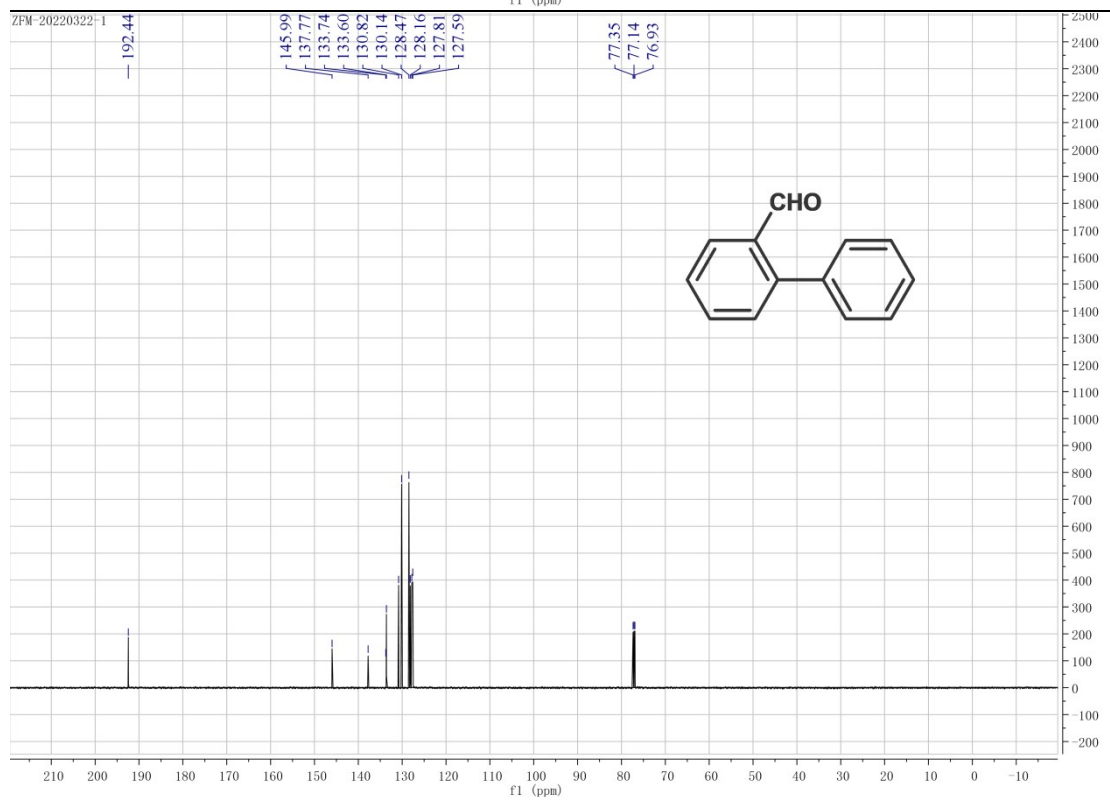

Fig. S16 <sup>1</sup>H and <sup>13</sup>C NMR spectra for 4-biphenylcarboxaldehyde.

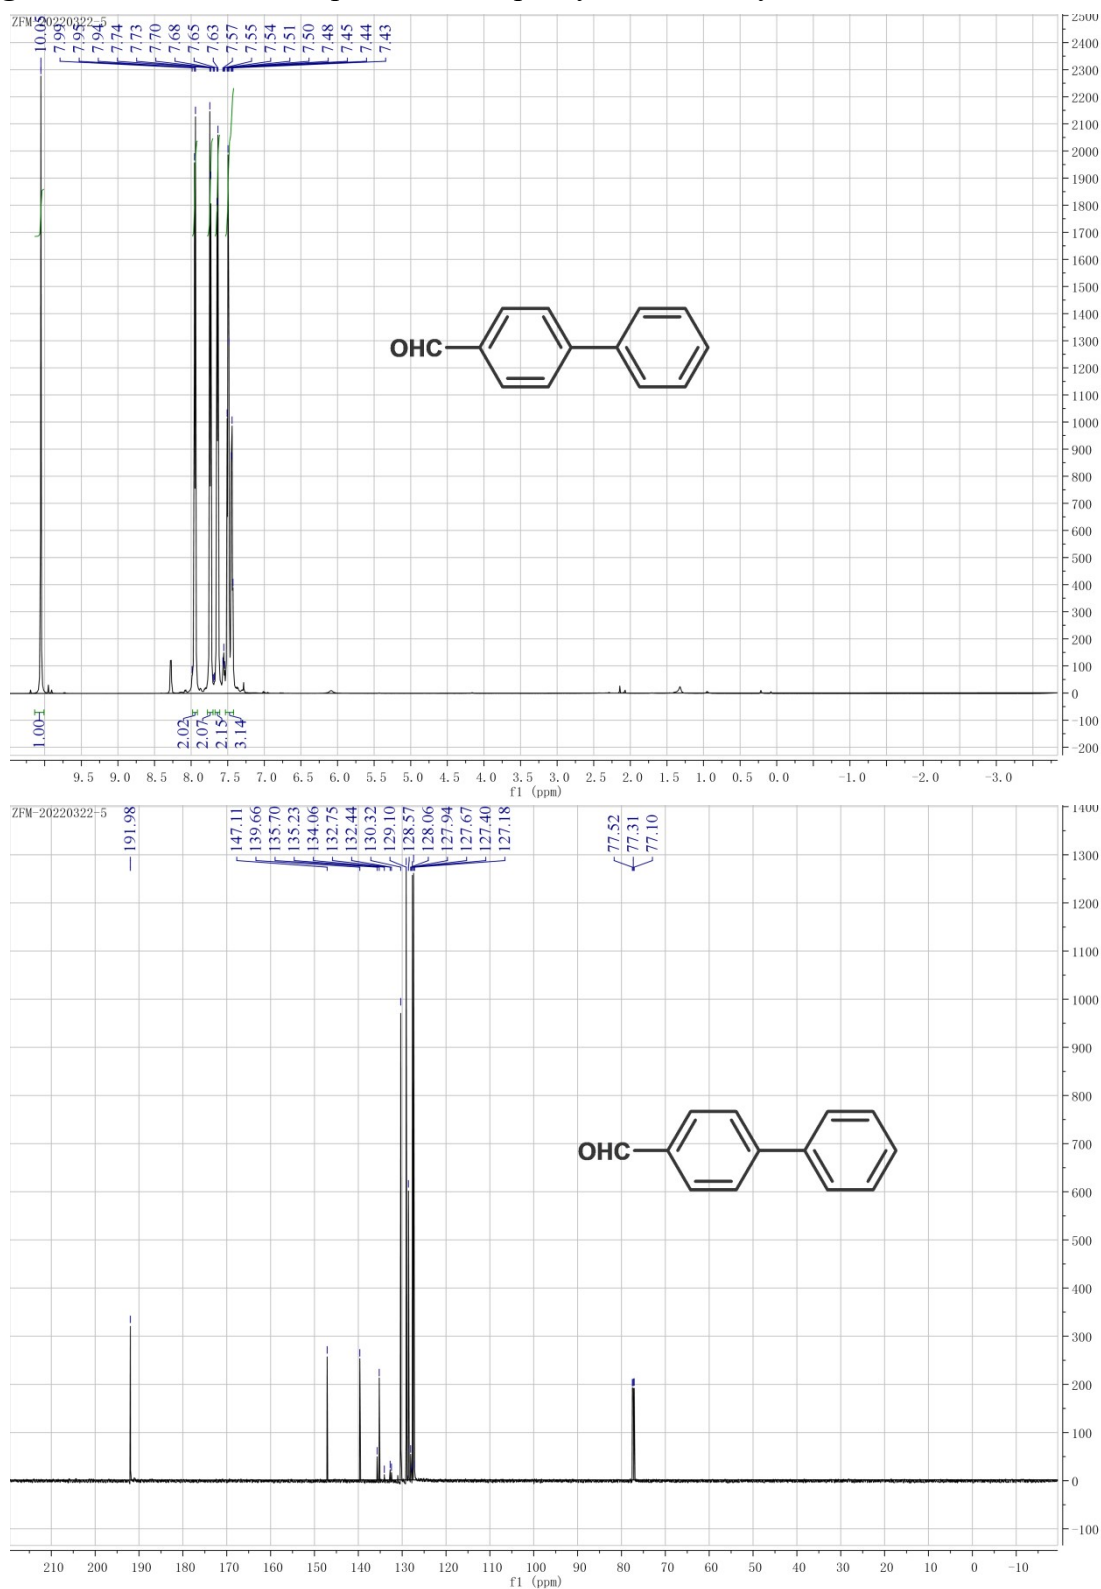

Fig. S17 <sup>1</sup>H and <sup>13</sup>C NMR spectra for 4-methoxybiphenyl.

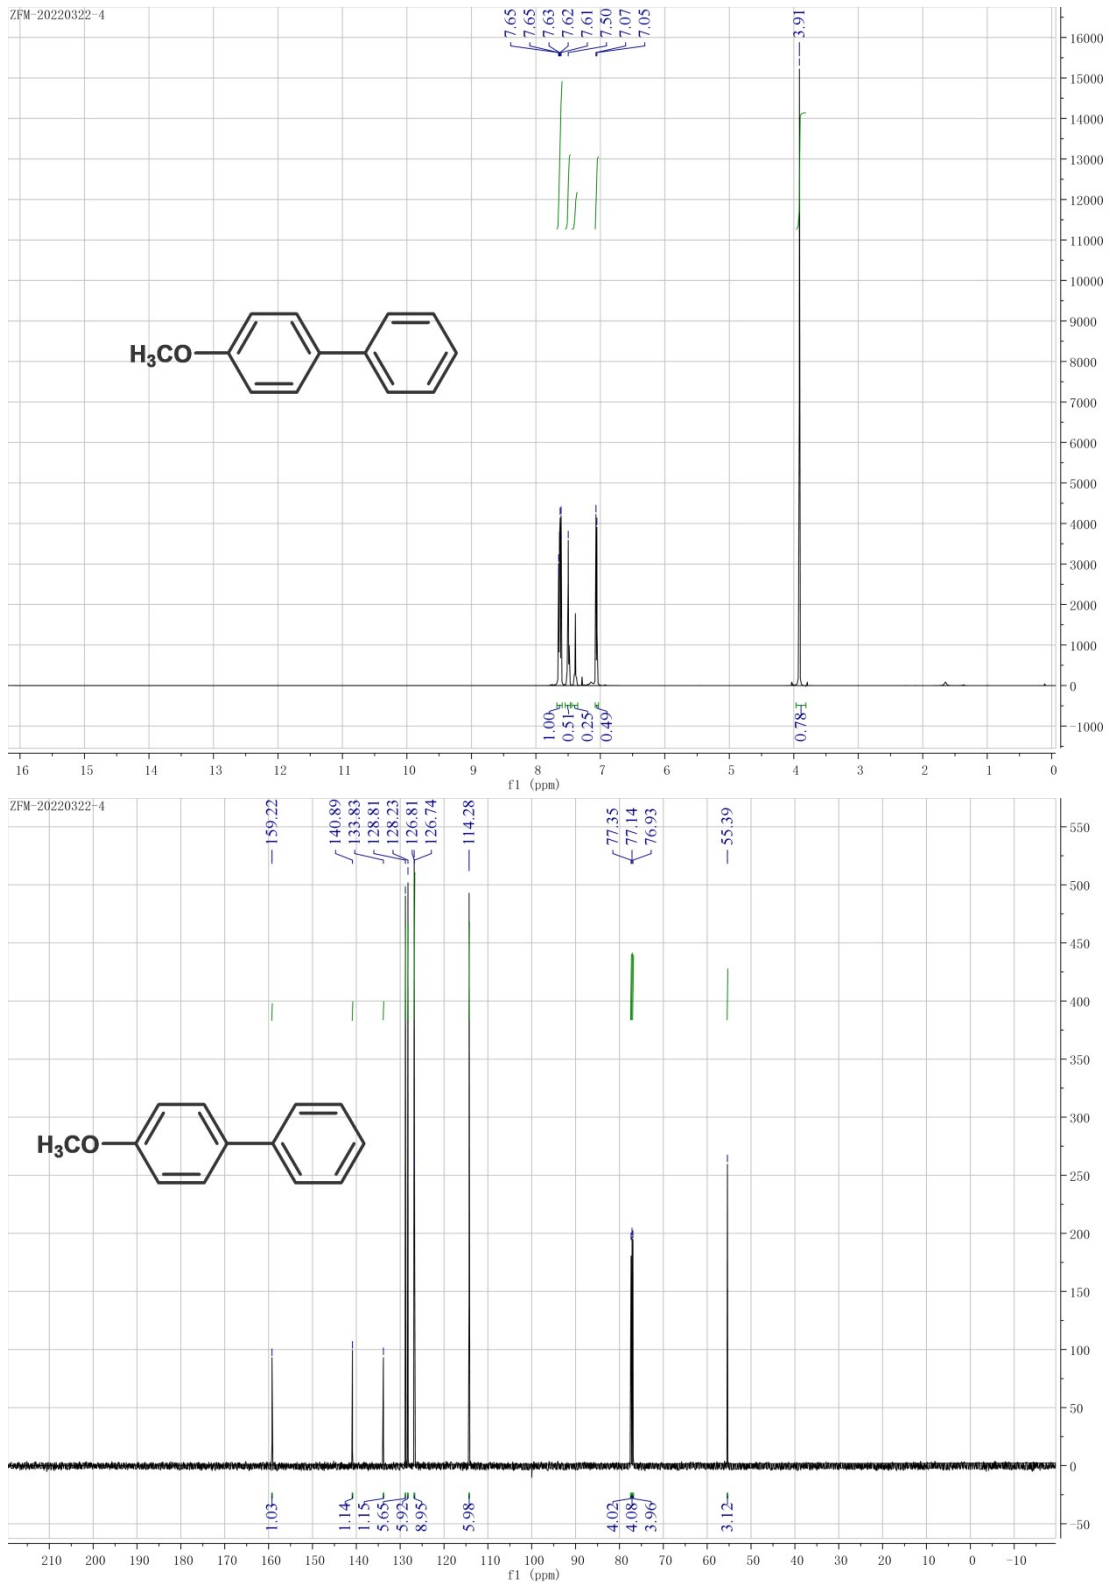

Fig. S18  $^1\text{H}$  and  $^{13}\text{C}$  NMR spectra for 2-phenyltoluene.

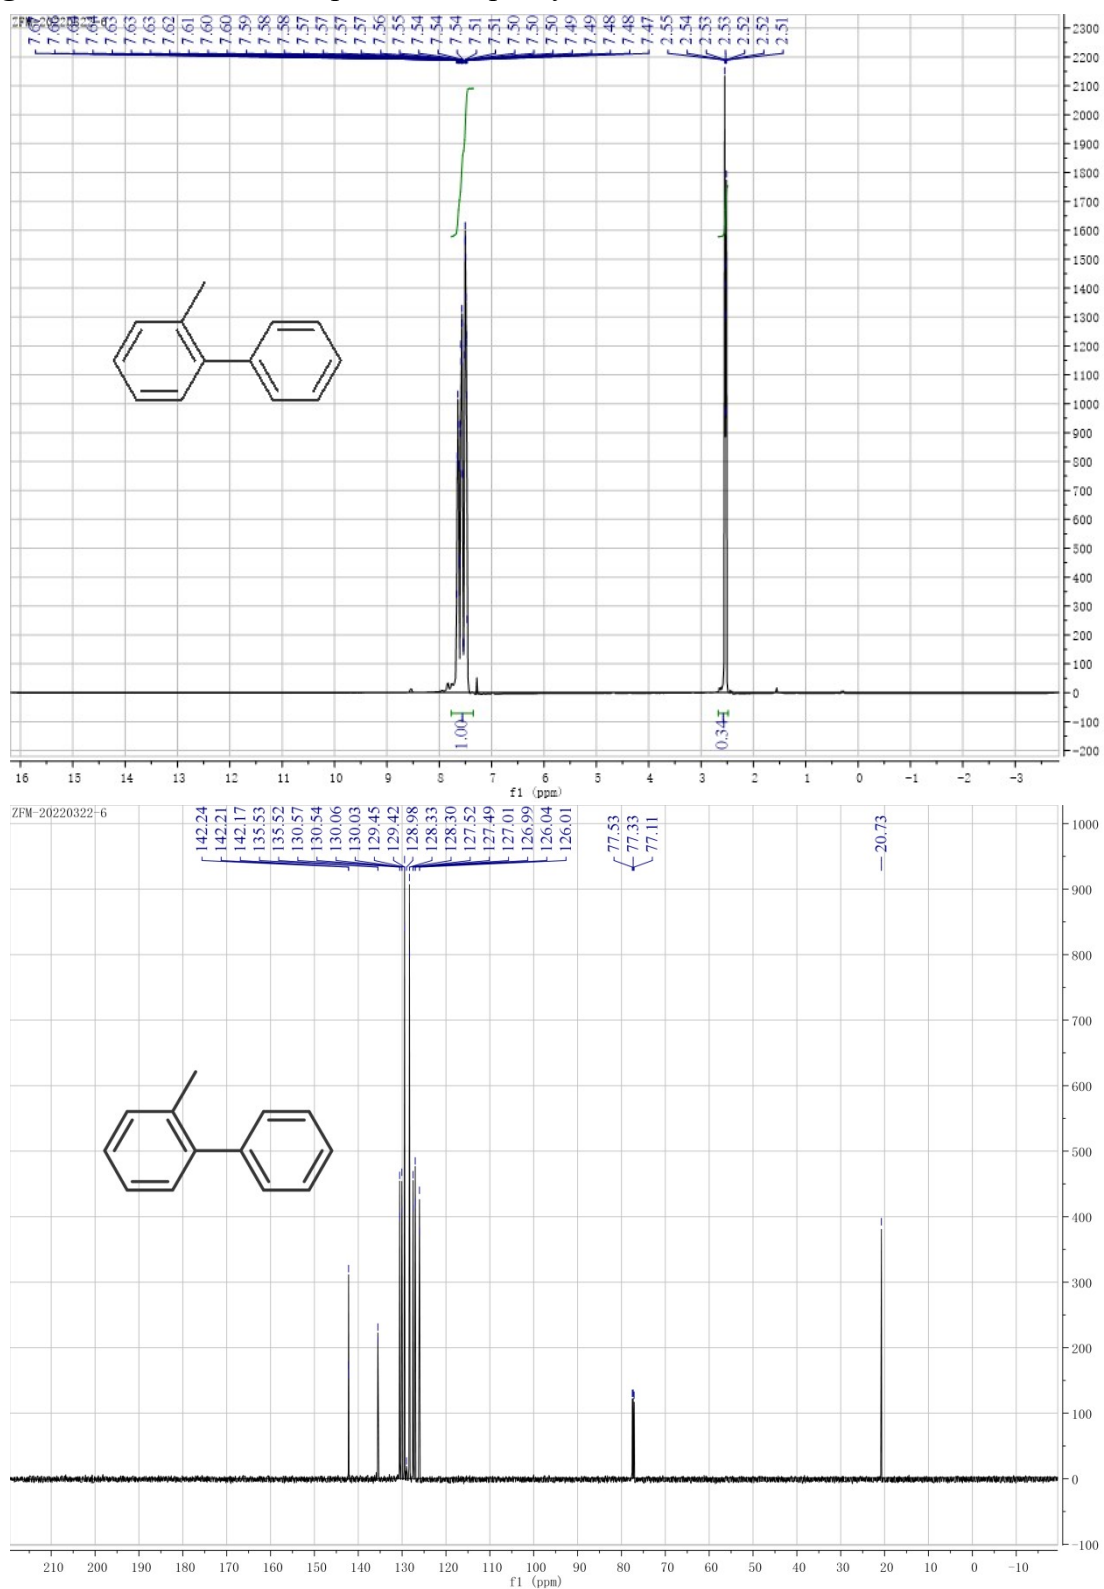



Fig. S19  $^1\text{H}$  and  $^{13}\text{C}$  NMR spectra for 4-phenyltoluene.

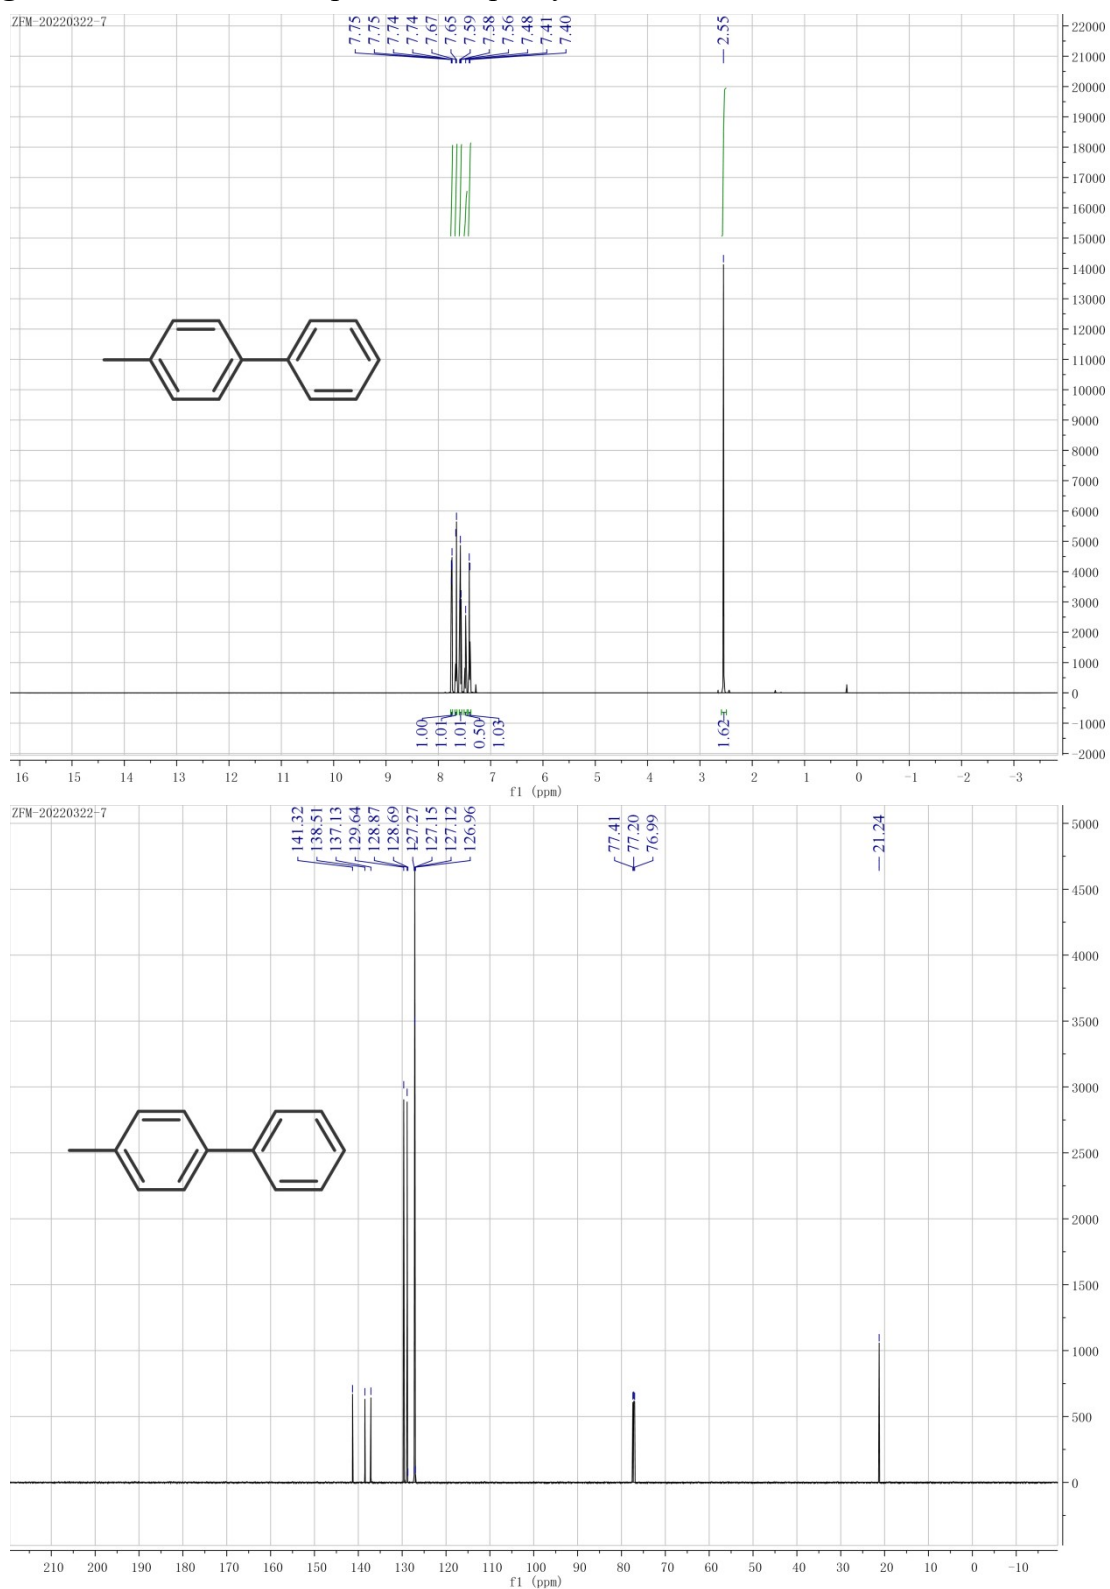

Fig. S20 <sup>1</sup>H and <sup>13</sup>C NMR spectra for 4-nitrobiphenyl.

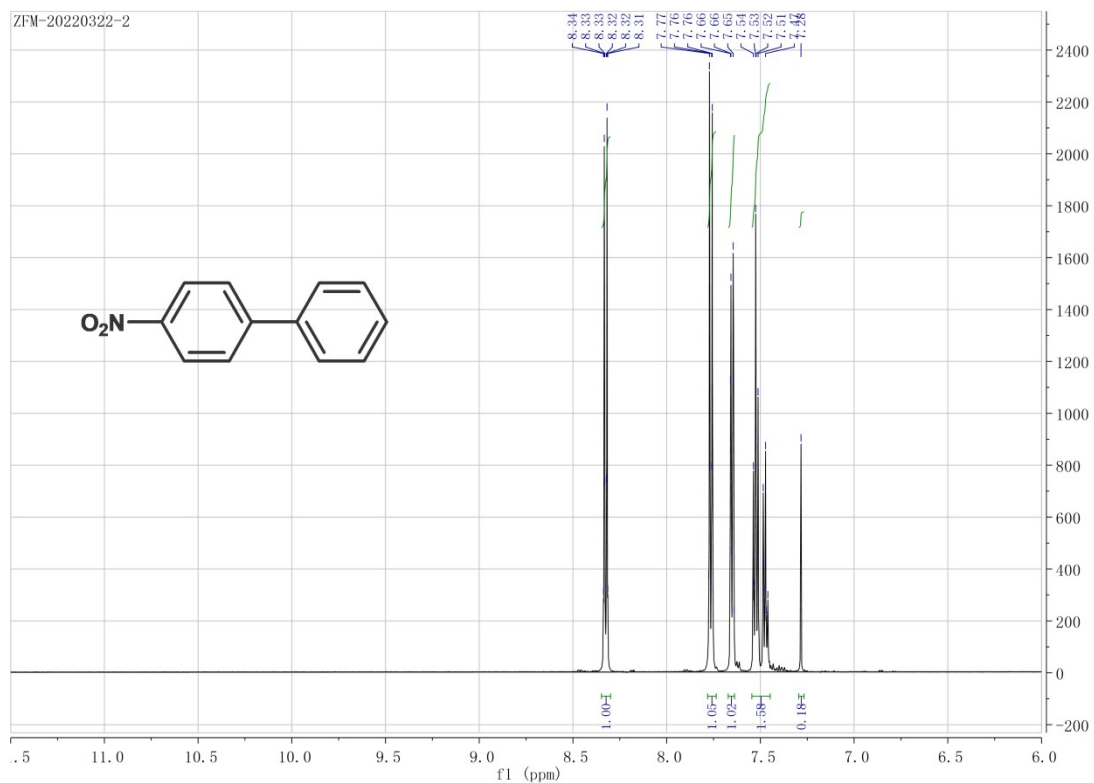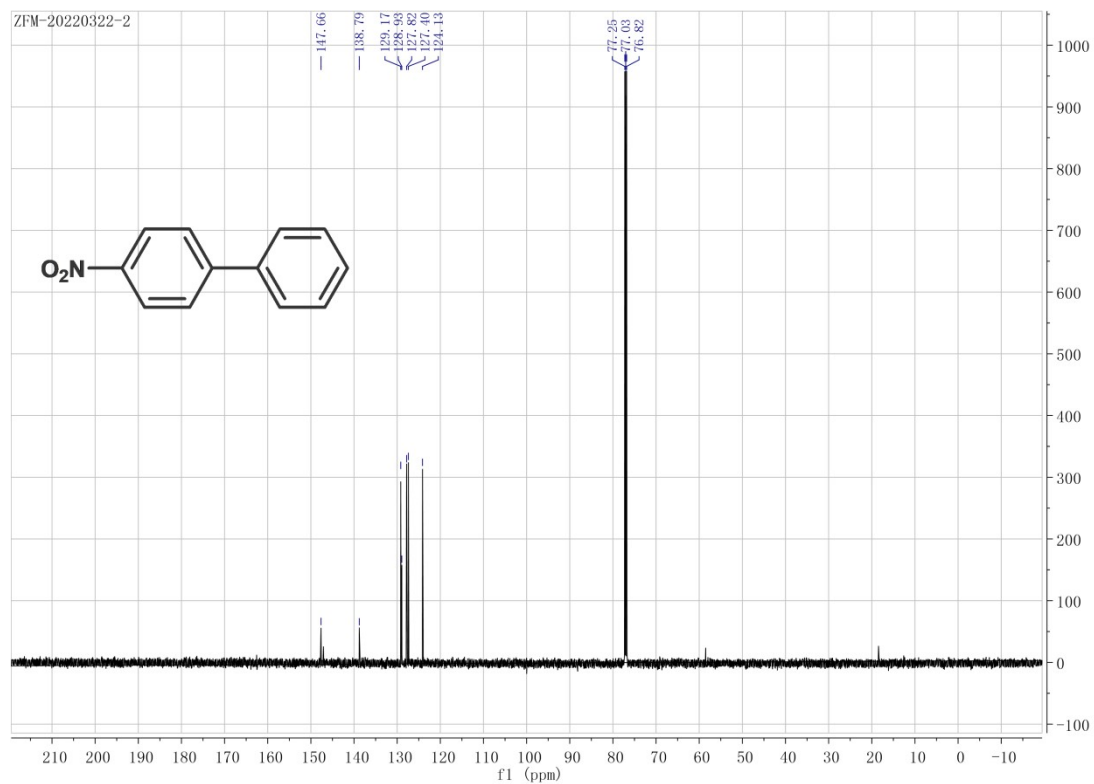

## MS spectra

Fig. S21 MS spectra of the biphenyl.

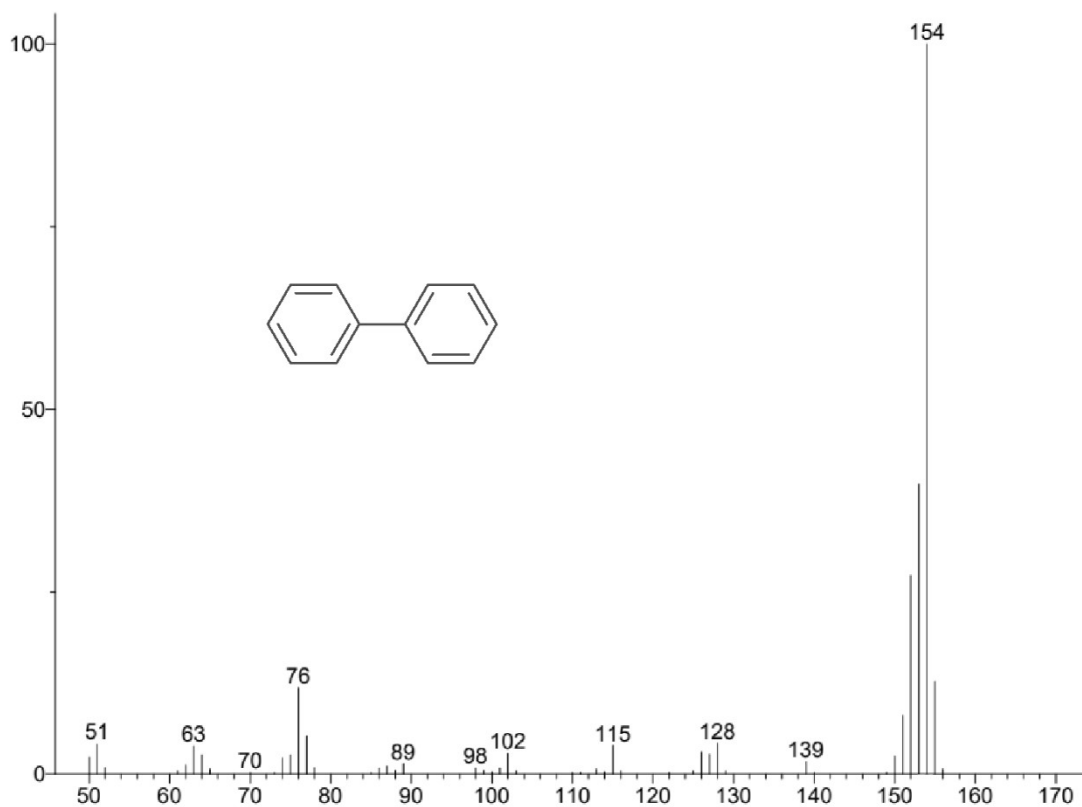

Fig. S22 MS spectra of the 2-biphenylcarboxaldehyde.

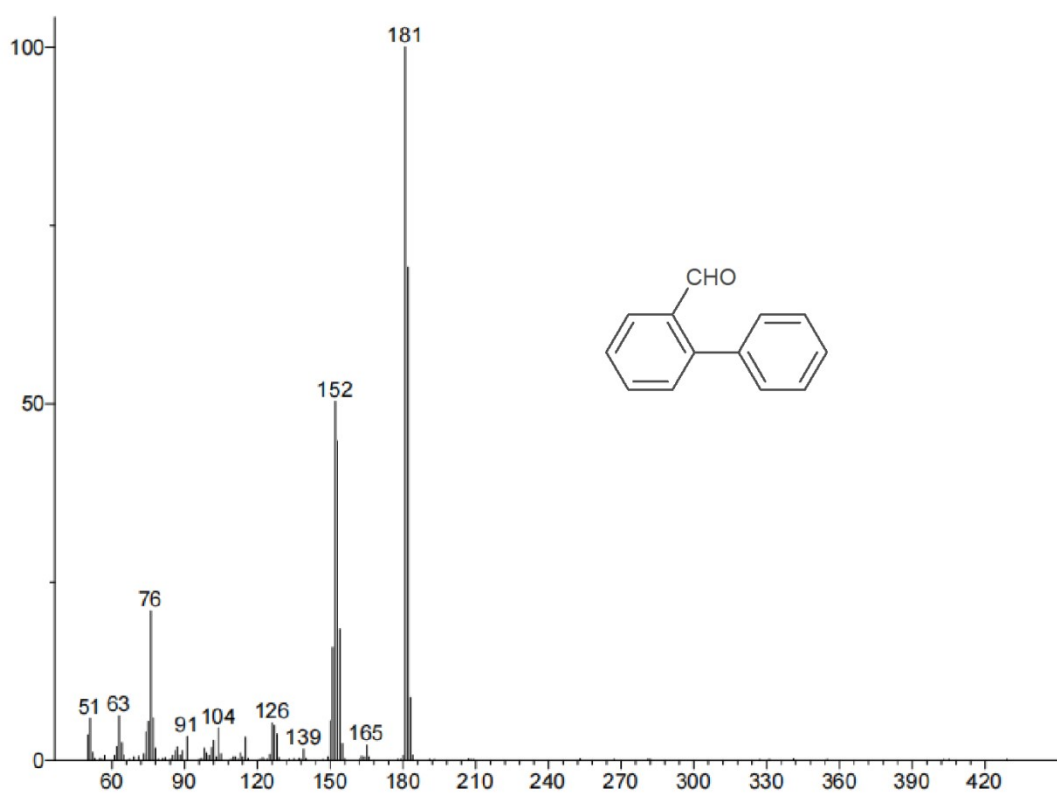

**Fig. S23** MS spectra of the 3-biphenylcarboxaldehyde.

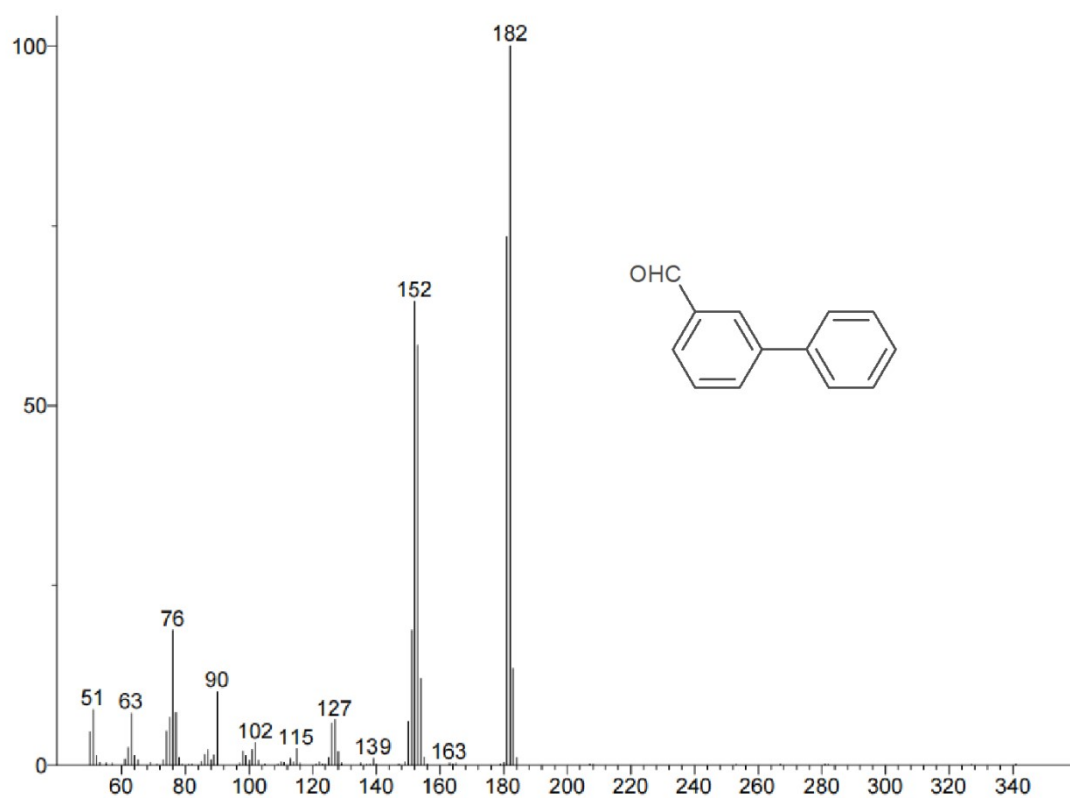

**Fig. S24** MS spectra of the 4-biphenylcarboxaldehyde.

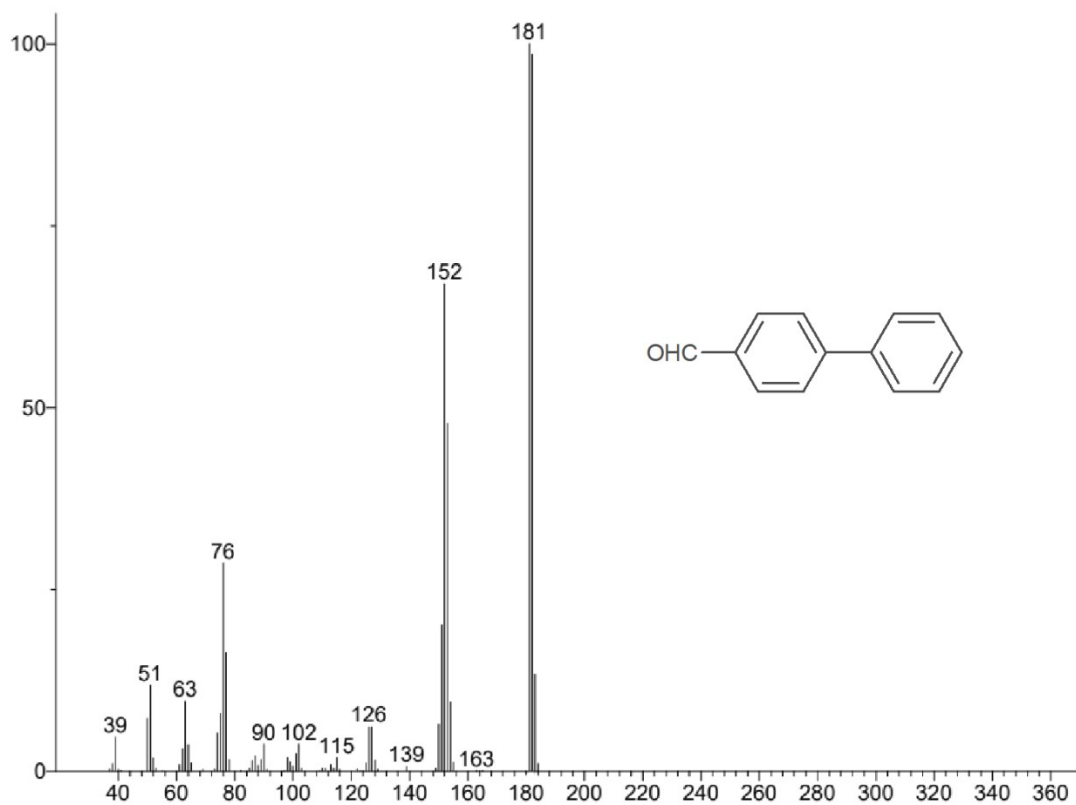

**Fig. S25** MS spectra of the 4-methoxybiphenyl.

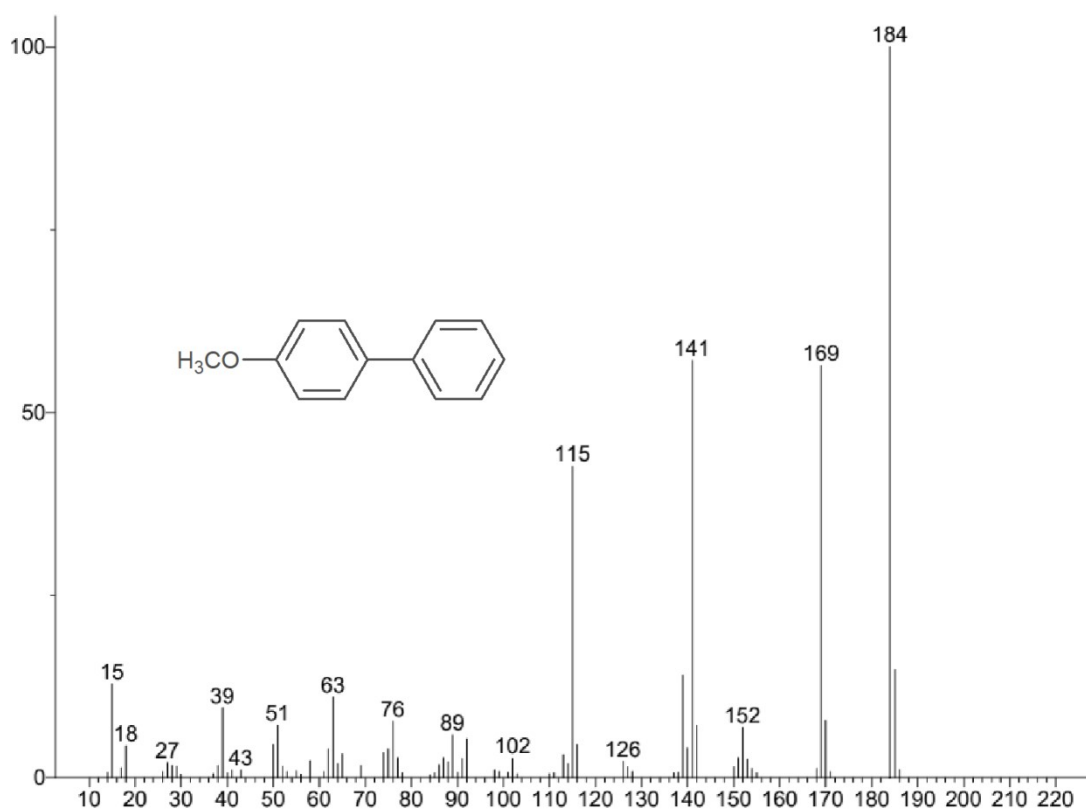

**Fig. S26** MS spectra of the 4-phenyltoluene.

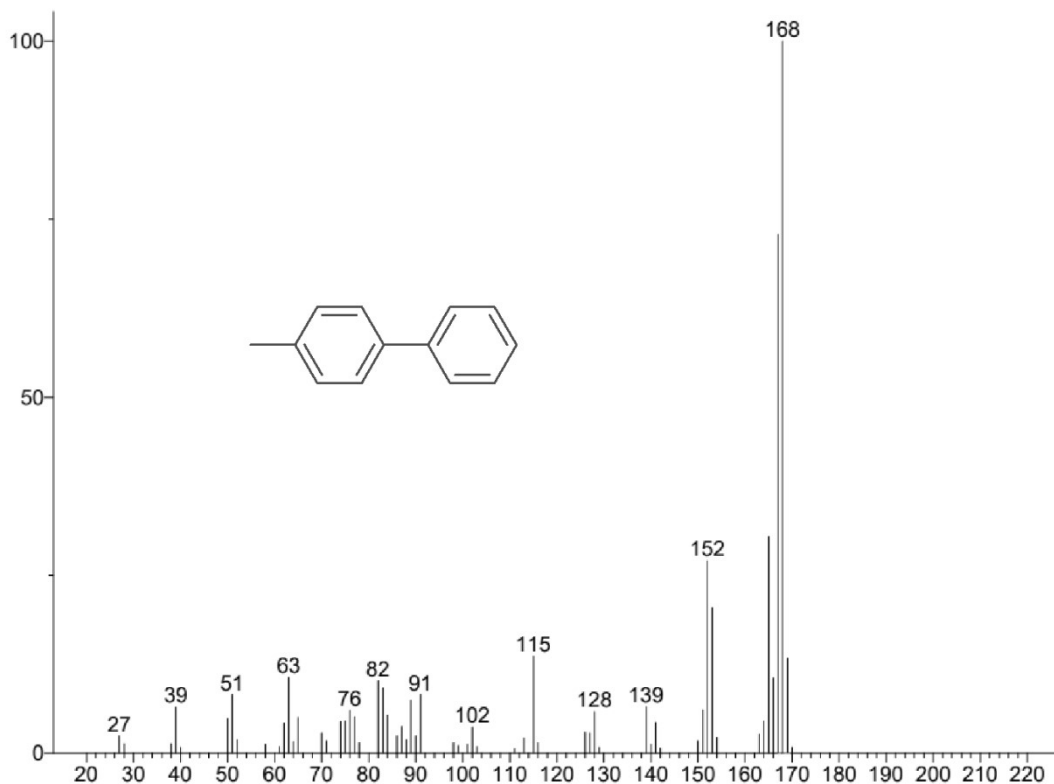

**Fig. S27** MS spectra of the 2-phenyltoluene.

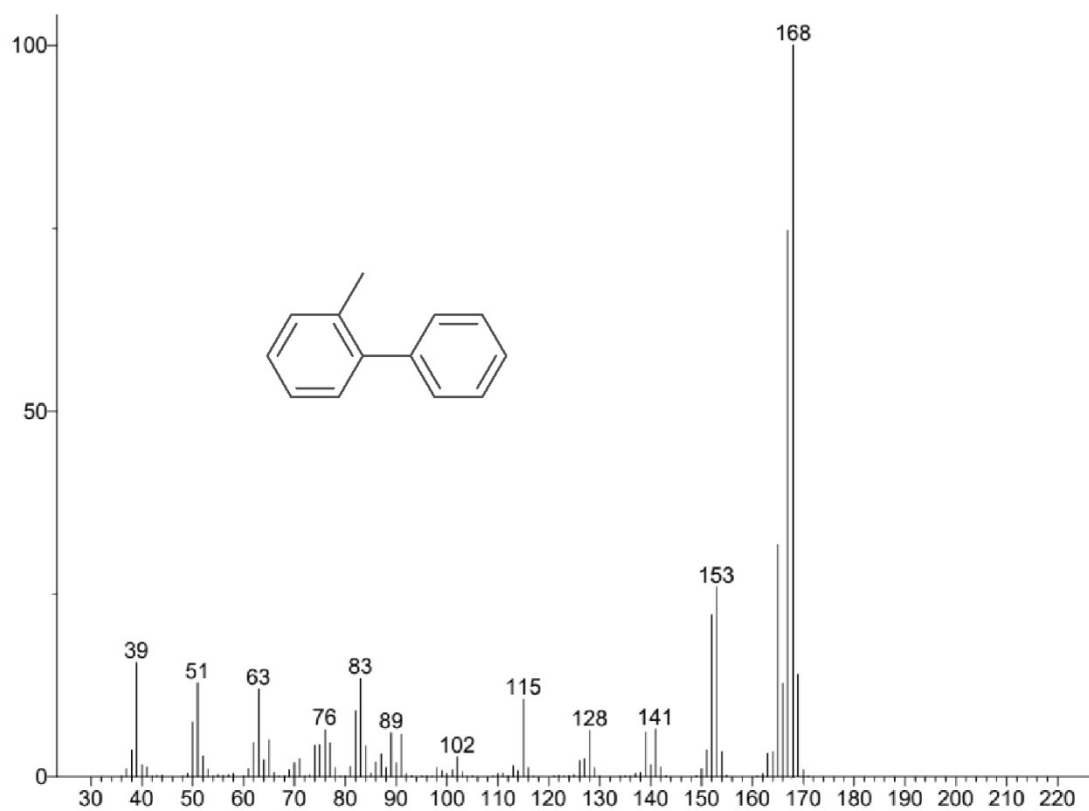

**Fig. S28** MS spectra of the 4-nitrobiphenyl.

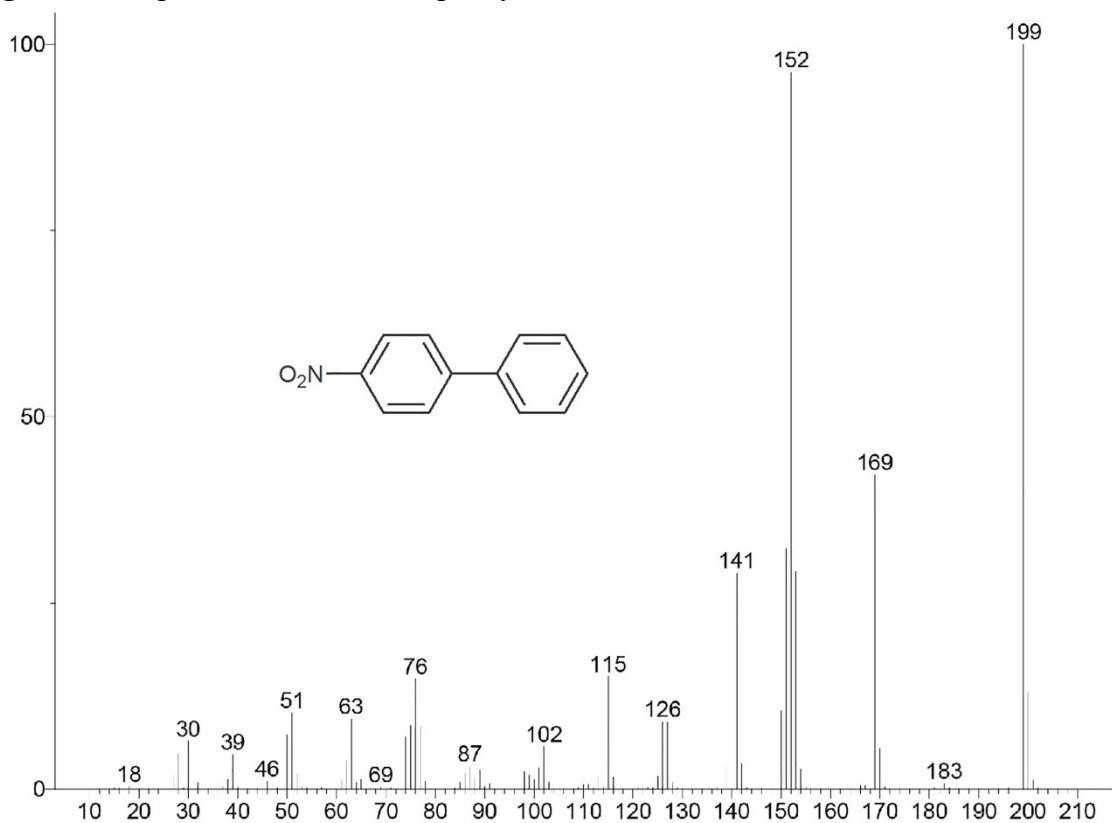

Supplement: d2nj00949h1.pdf [file d2nj00949h1.pdf]
